# Supplementary material
Source: MDPI journal article supplement (https://www.mdpi.com/1424-8247/14/11/1097)

*Supplementary material*

## **Investigation of the Mechanisms of Cytotoxic Activity of 1,3-Disubstituted Thiourea Derivatives**

**Paulina Strzyga-Łach <sup>1</sup>, Alicja Chrzanowska <sup>1</sup>, Katarzyna Podsadni <sup>1</sup>, Anna Bielenica <sup>1,\*</sup>**

*<sup>1</sup> Chair and Department of Biochemistry, Medical University of Warsaw, 02-097 Warszawa, Poland*

**\*Corresponding author:** Anna Bielenica, Chair and Department of Biochemistry, Medical University of Warsaw, Banacha 1 Street, 02-097 Warszawa, Poland;  
Tel: (48)022-572-06-93; Fax: (48)022-572-06-79; e-mail: [abielenica@wum.edu.pl](mailto:abielenica@wum.edu.pl)

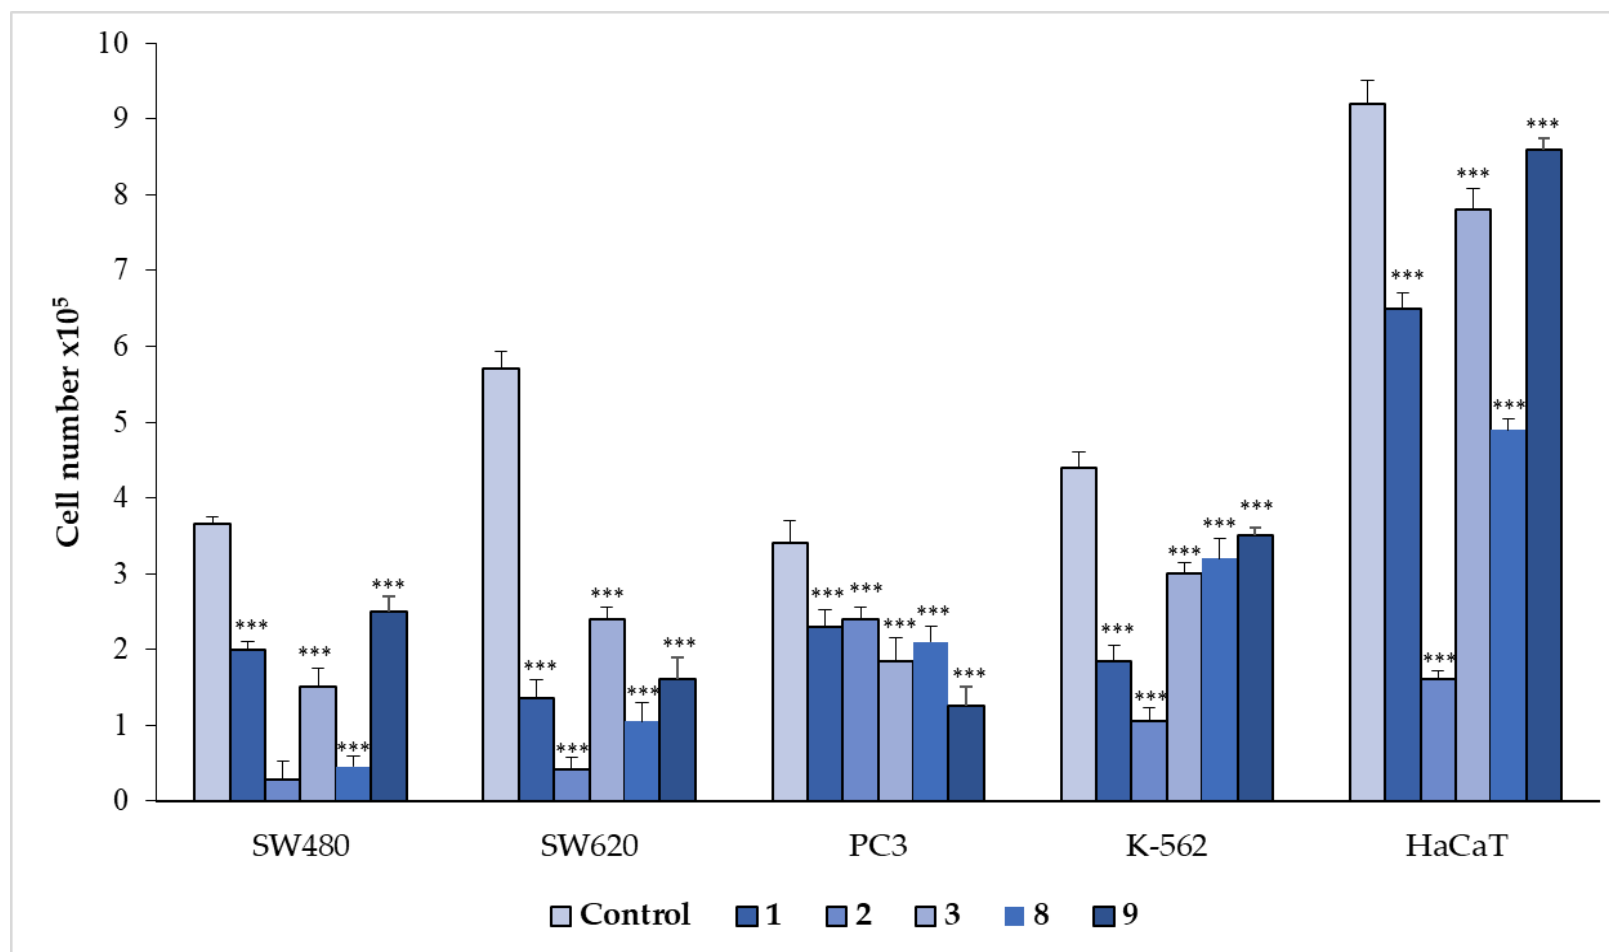

**Figure S1A.** Trypan blue assay. The effect of compounds **1**, **2**, **3**, **8** and **9** on cell number in SW480, SW620, PC3, K-562 and HaCaT cells. Cells were incubated for 72 h with tested compounds used in their IC<sub>50</sub> concentrations, then cells were harvested, stained with trypan blue, and analyzed using cell counter. Data are expressed as the mean  $\pm$  SD. \*\*\*  $p \leq 0.001$ , \*\*  $p \leq 0.01$ , \*  $p \leq 0.05$ , as compared to the control.

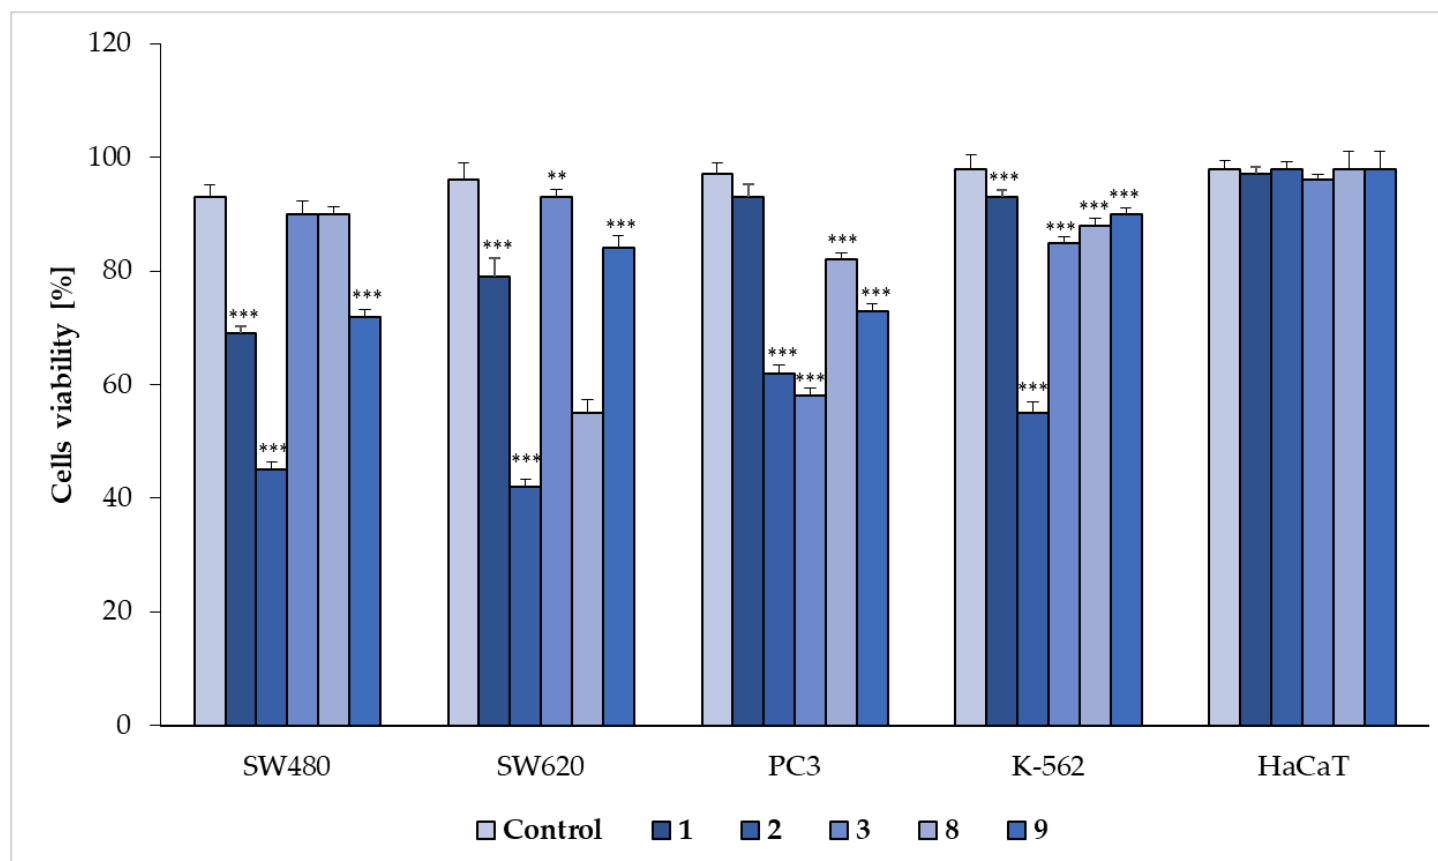

**Figure S1B.** Trypan blue assay. The effect of compounds **1**, **2**, **3**, **8** and **9** on viability in SW480, SW620, PC3, K-562 and HaCaT cells. Cells were incubated for 72 h with tested compounds used in their IC<sub>50</sub> concentrations, then cells were harvested, stained with trypan blue, and analyzed using cell counter. Data are expressed as the mean  $\pm$  SD. \*\*\*  $p \leq 0.001$ , \*\*  $p \leq 0.01$ , \*  $p \leq 0.05$ , as compared to the control.

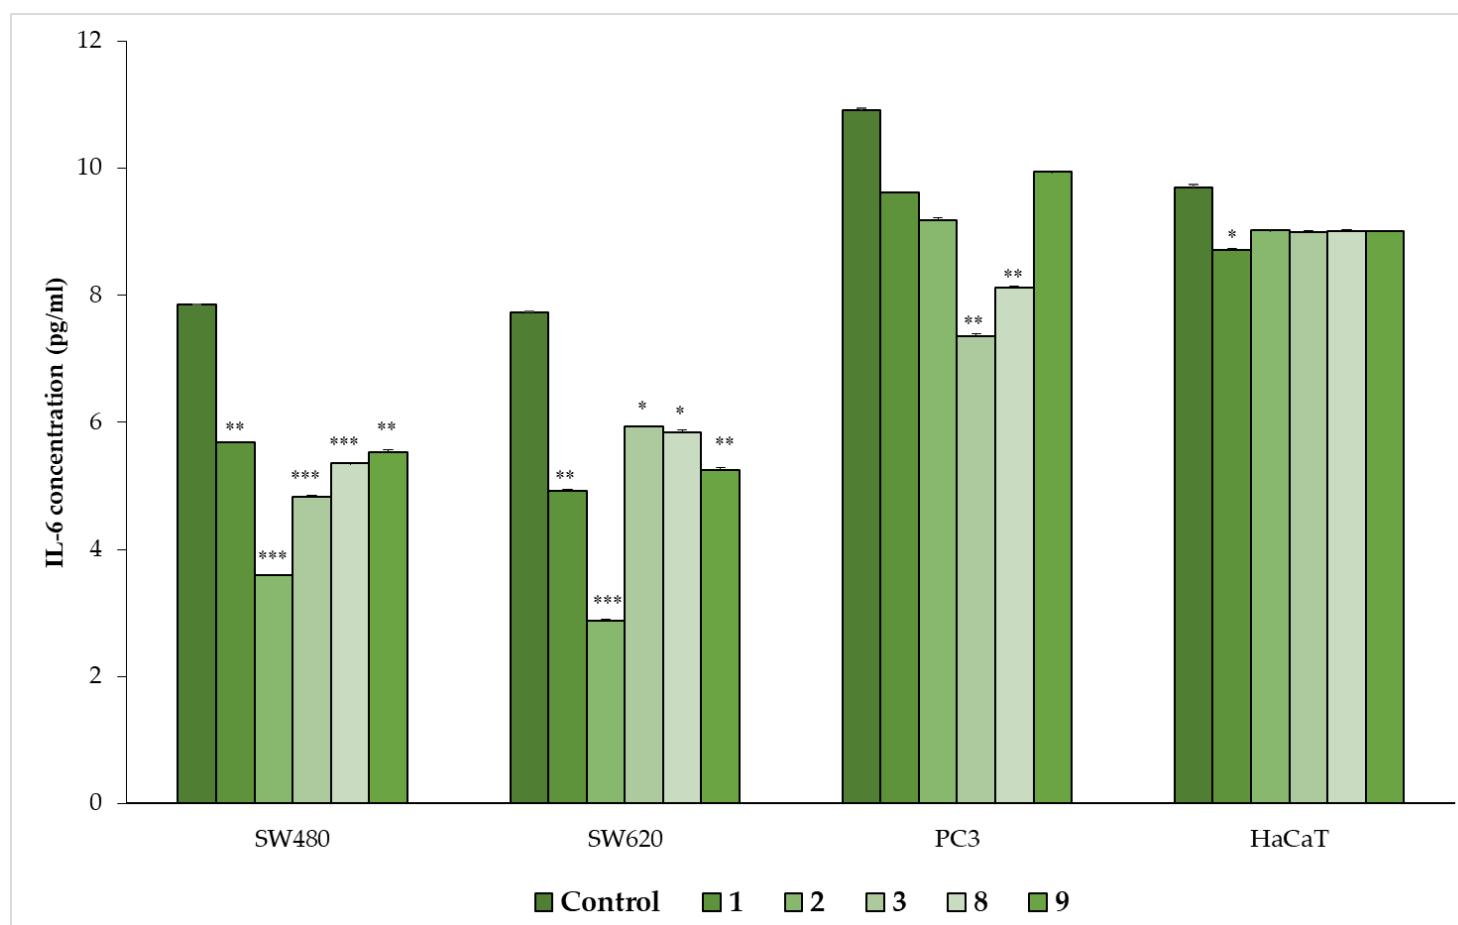

**Figure S2.** Effects of compounds **1-3, 8** and **9** on IL-6 levels, measured by ELISA test. Data are expressed as the mean  $\pm$  SD, \*\*\*  $p \leq 0.001$ , \*\*  $p \leq 0.01$ , \*  $p \leq 0.05$ , as compared to the control.

Structural formulas of compounds 3-8, 11.

| Compound | Structural formula                                                                 |
|----------|------------------------------------------------------------------------------------|
| 3        | 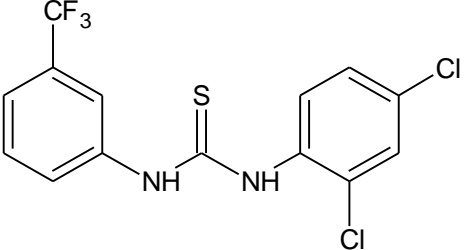  |
| 4        |   |
| 5        |  |

|    |                                                                                    |
|----|------------------------------------------------------------------------------------|
| 6  | 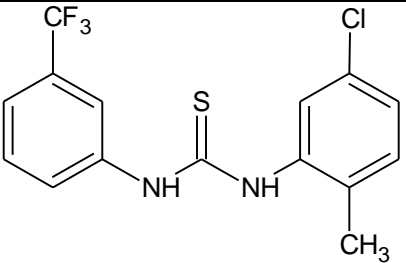  |
| 7  |   |
| 8  |   |
| 11 |  |

**$^1\text{H}$  NMR and  $^{13}\text{C}$  NMR spectra of compounds 3-8, 11.**

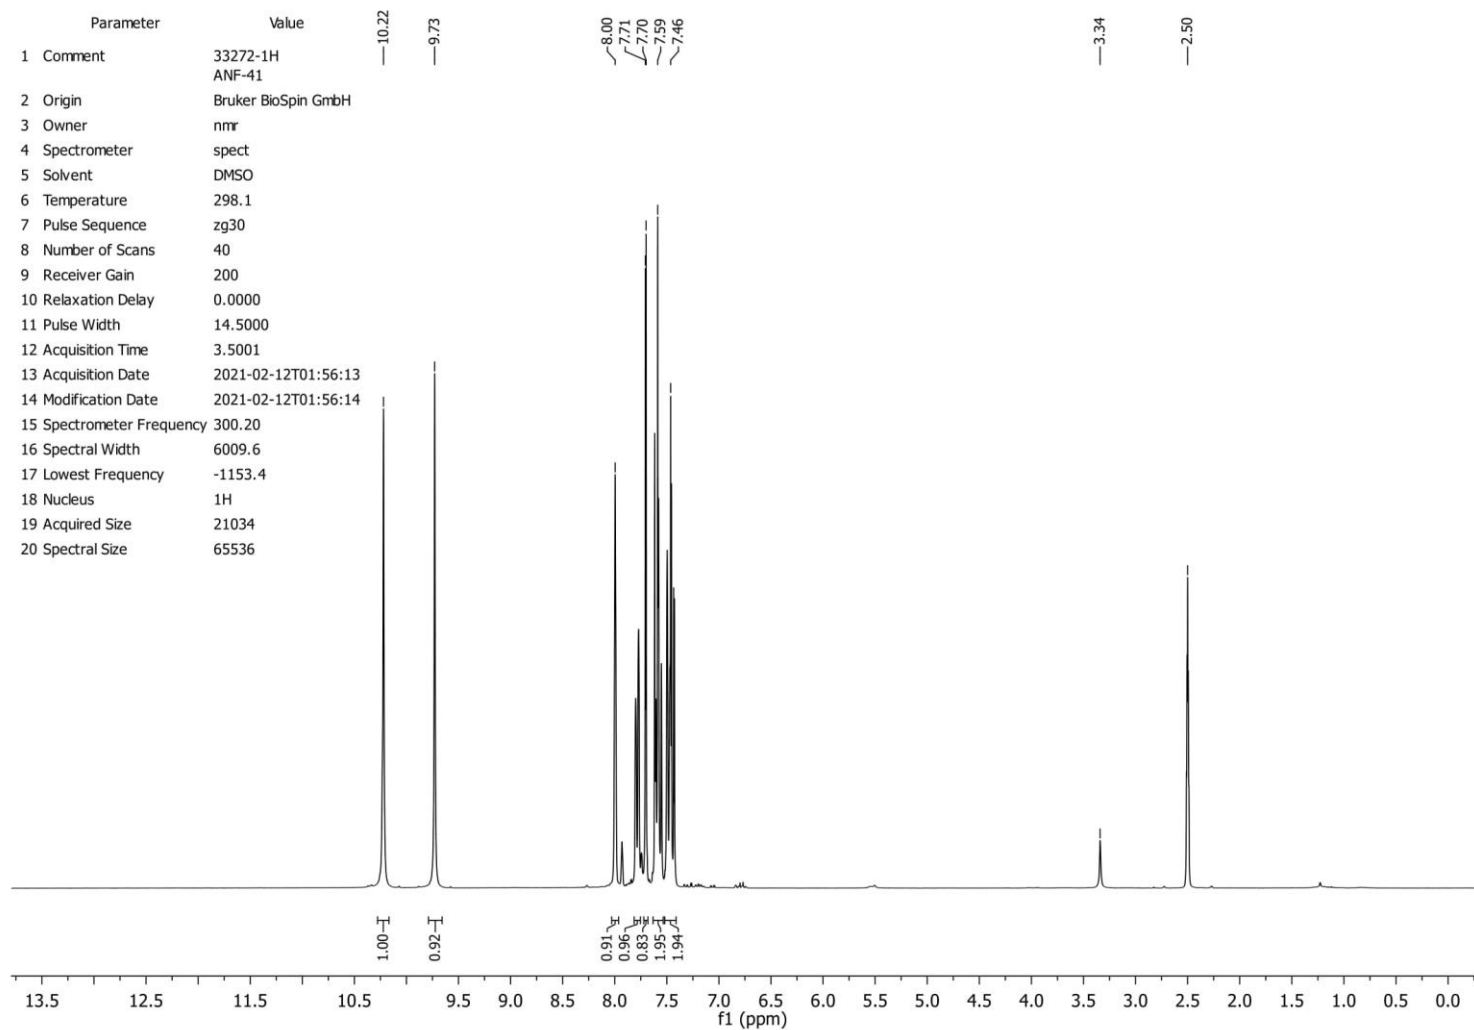

**Spectrum 1.** <sup>1</sup>H NMR of compound **3** (300 MHz, DMSO-d<sub>6</sub>).



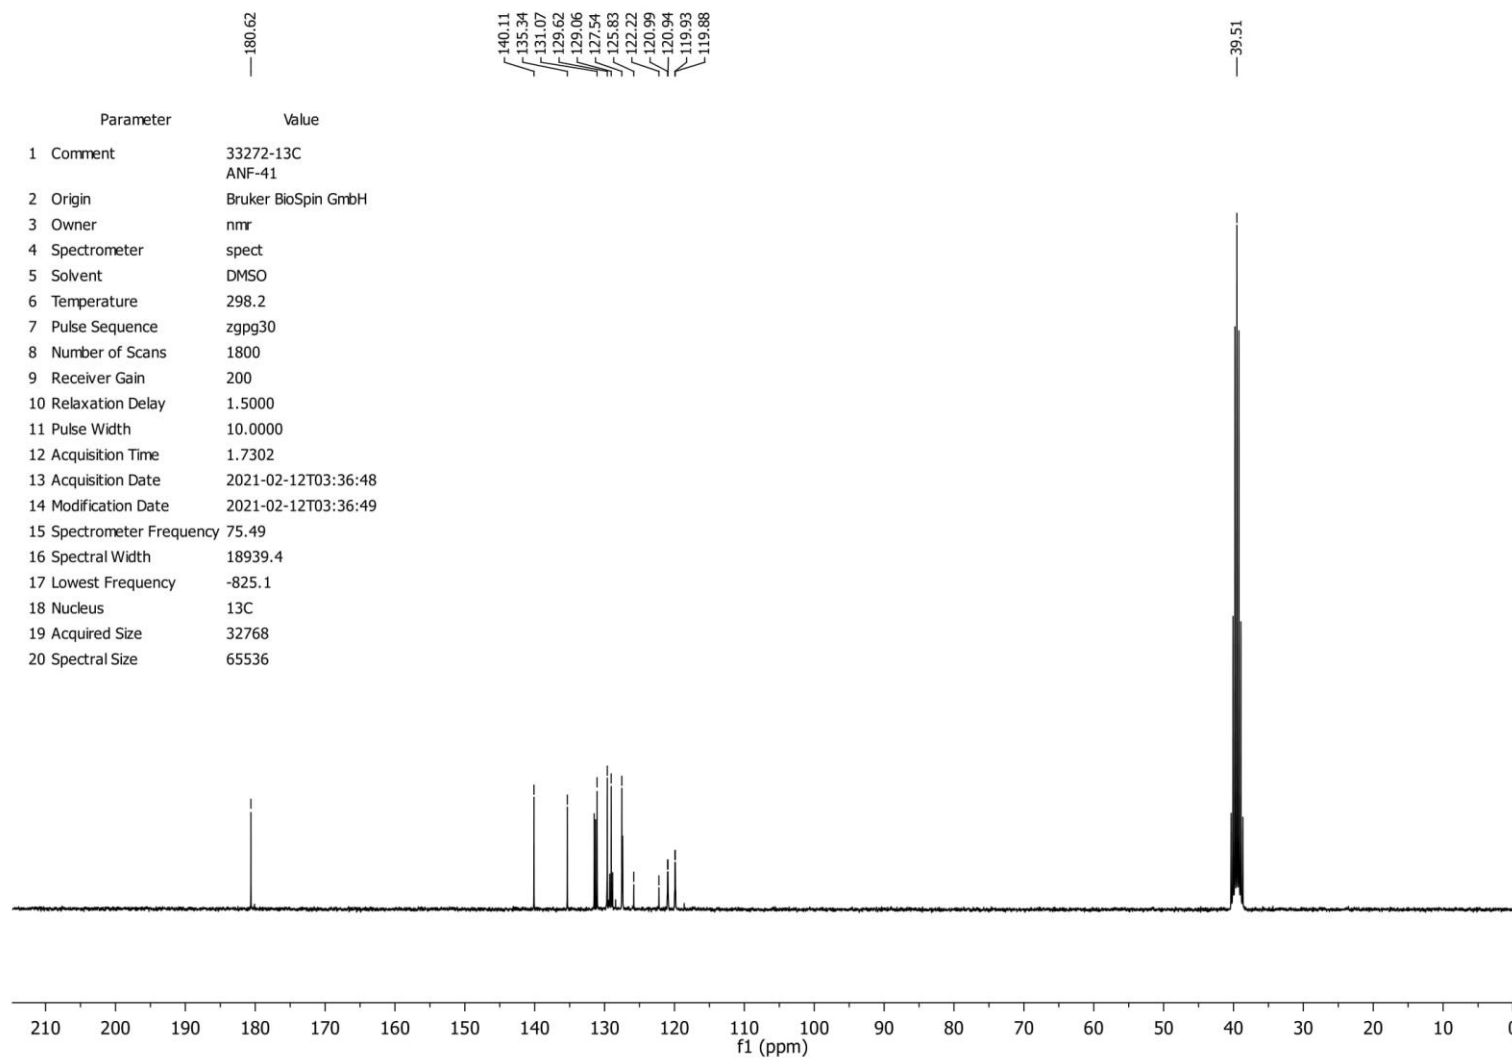

**Spectrum 2.** <sup>13</sup>C NMR of compound **3** (75.5 MHz, DMSO-d<sub>6</sub>).

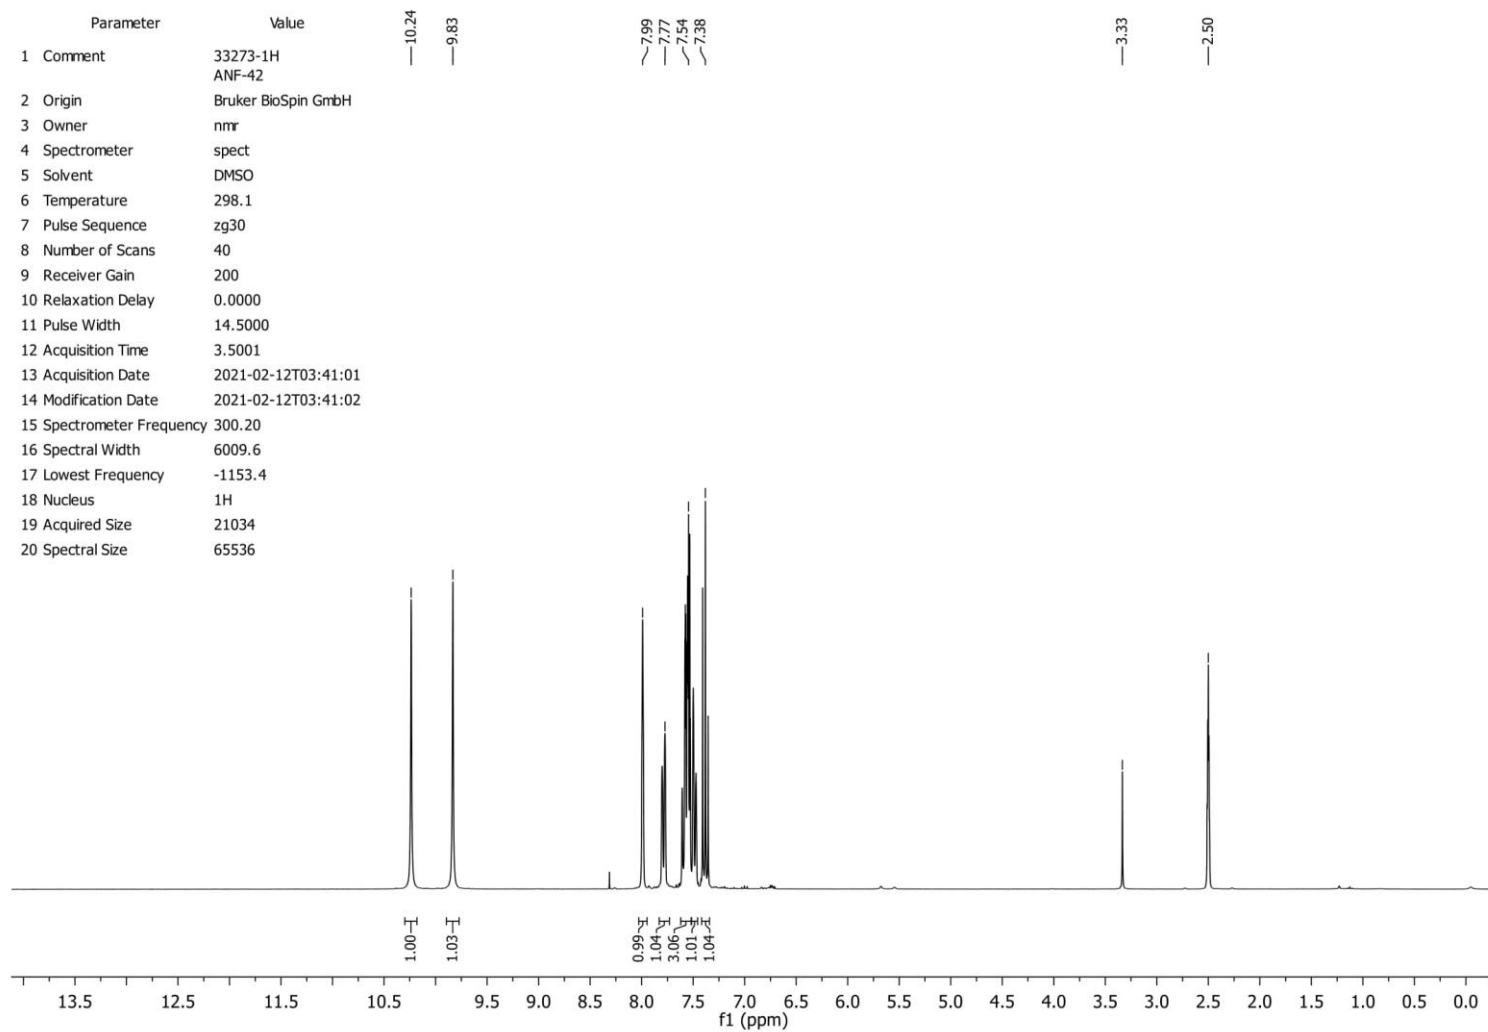

**Spectrum 3.** <sup>1</sup>H NMR of compound **4** (300 MHz, DMSO-d<sub>6</sub>).

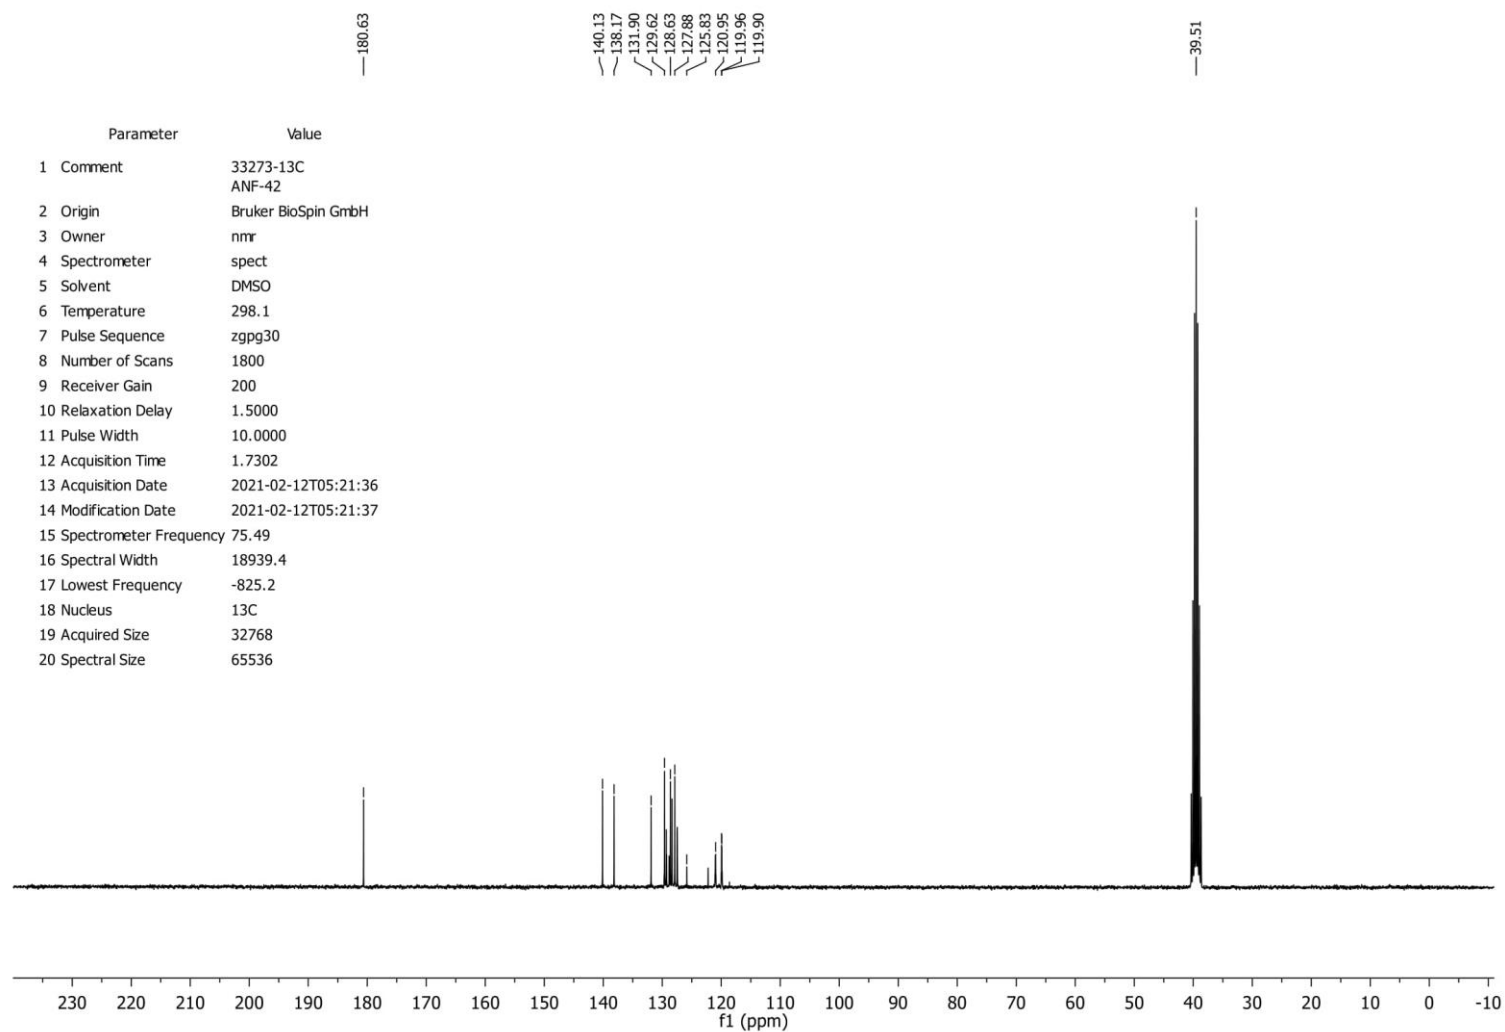

**Spectrum 4.**  $^{13}\text{C}$  NMR of compound **4** (75.5 MHz,  $\text{DMSO-d}_6$ ).

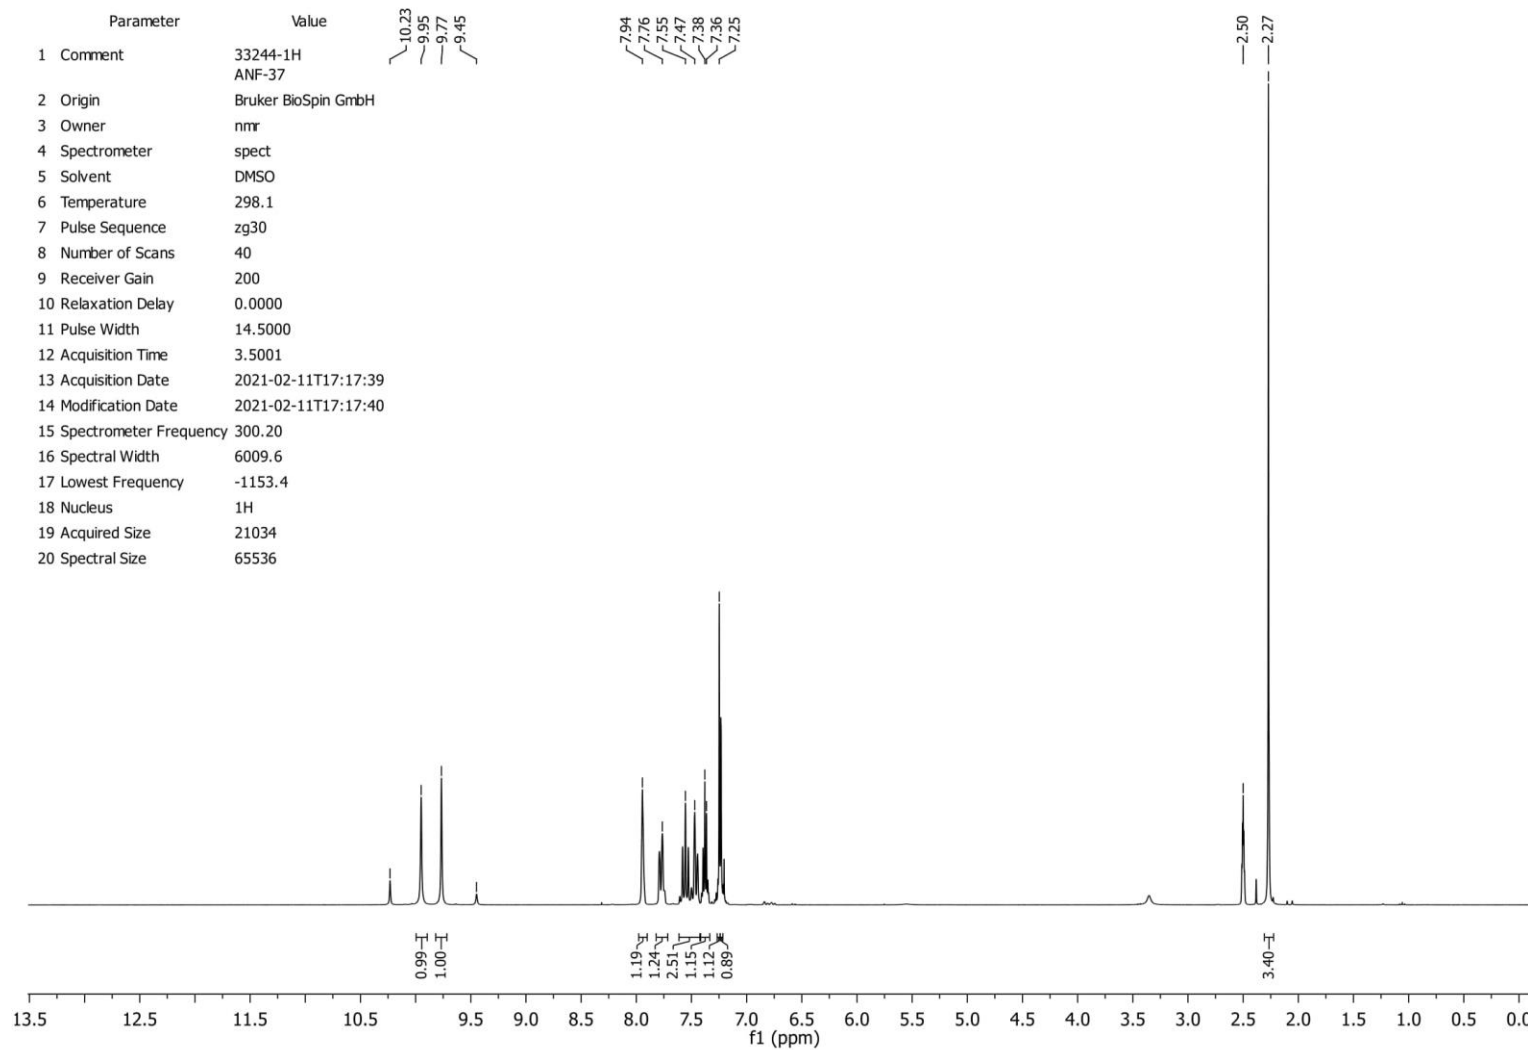

**Spectrum 5.**  $^1\text{H}$  NMR of compound **5** (300 MHz,  $\text{DMSO-d}_6$ ).

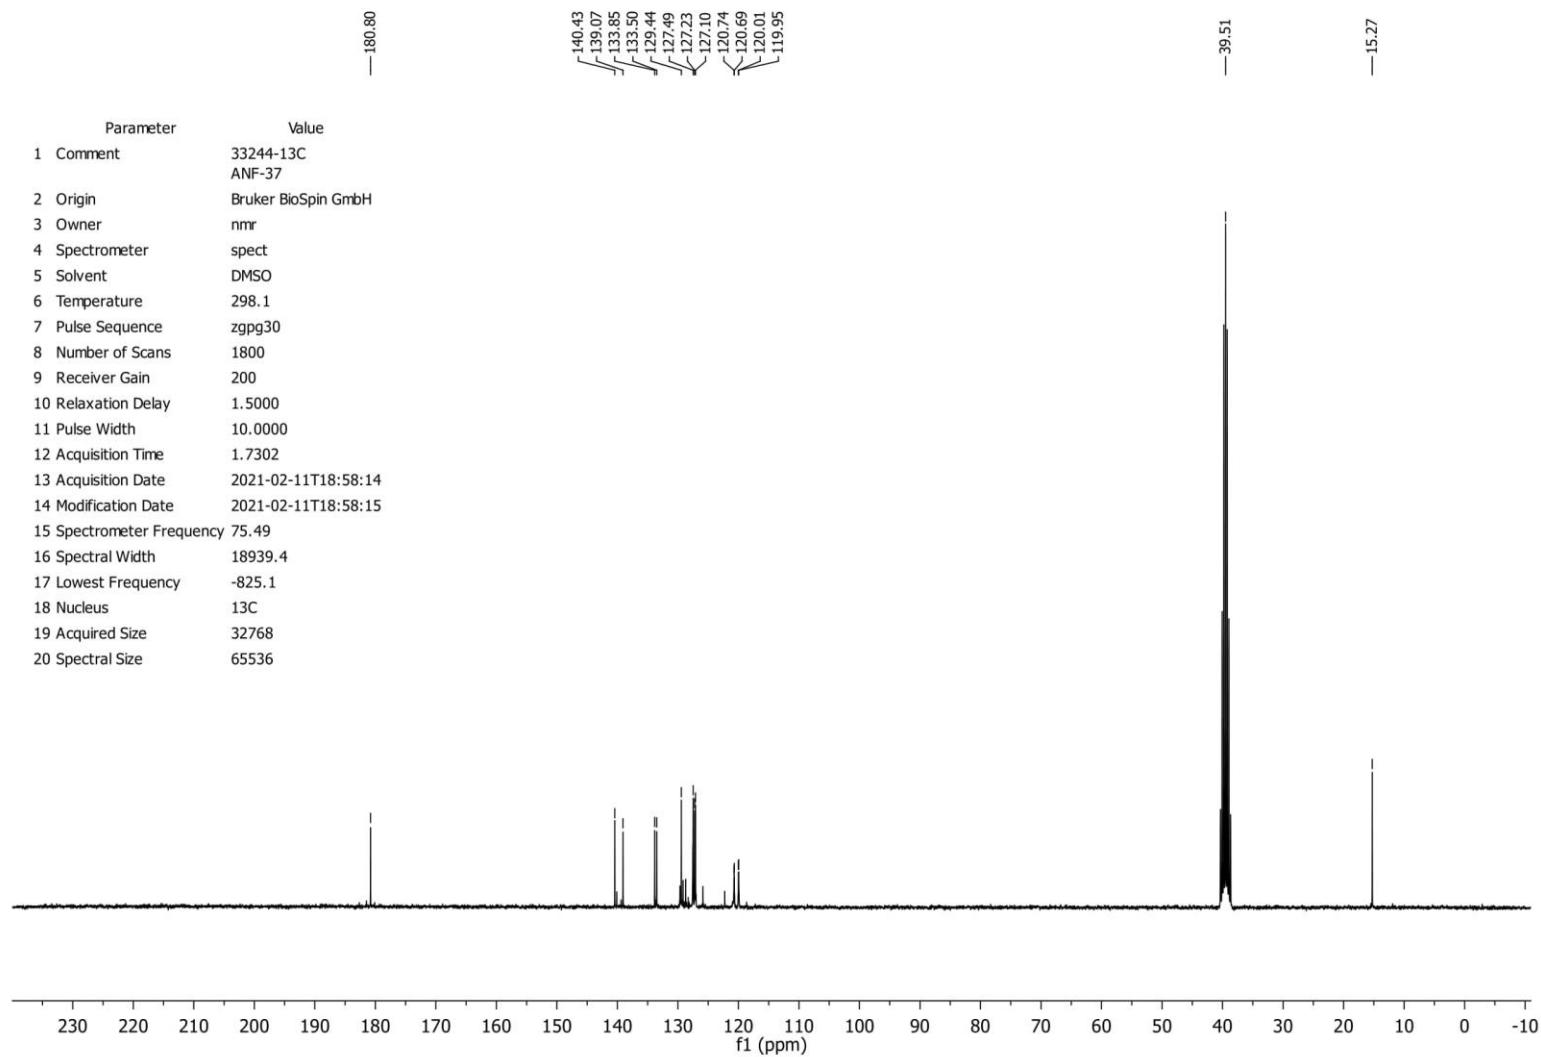

**Spectrum 6.**  $^{13}\text{C}$  NMR of compound **5** (75.5 MHz,  $\text{DMSO-d}_6$ ).

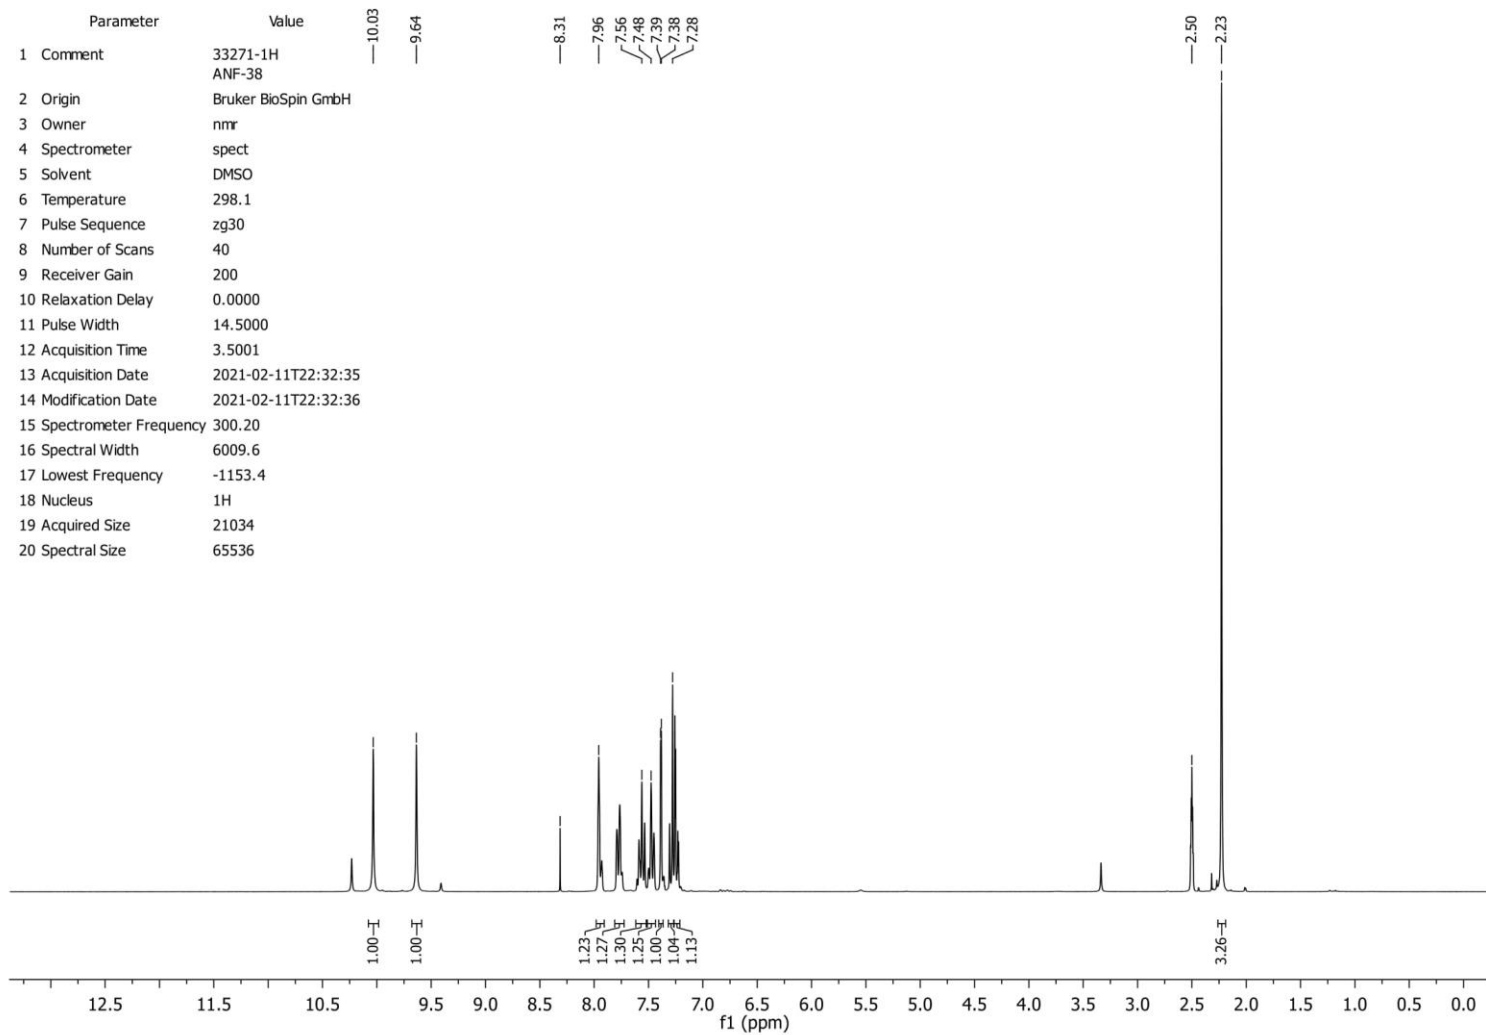

**Spectrum 7.** <sup>1</sup>H NMR of compound **6** (300 MHz, DMSO-d<sub>6</sub>).

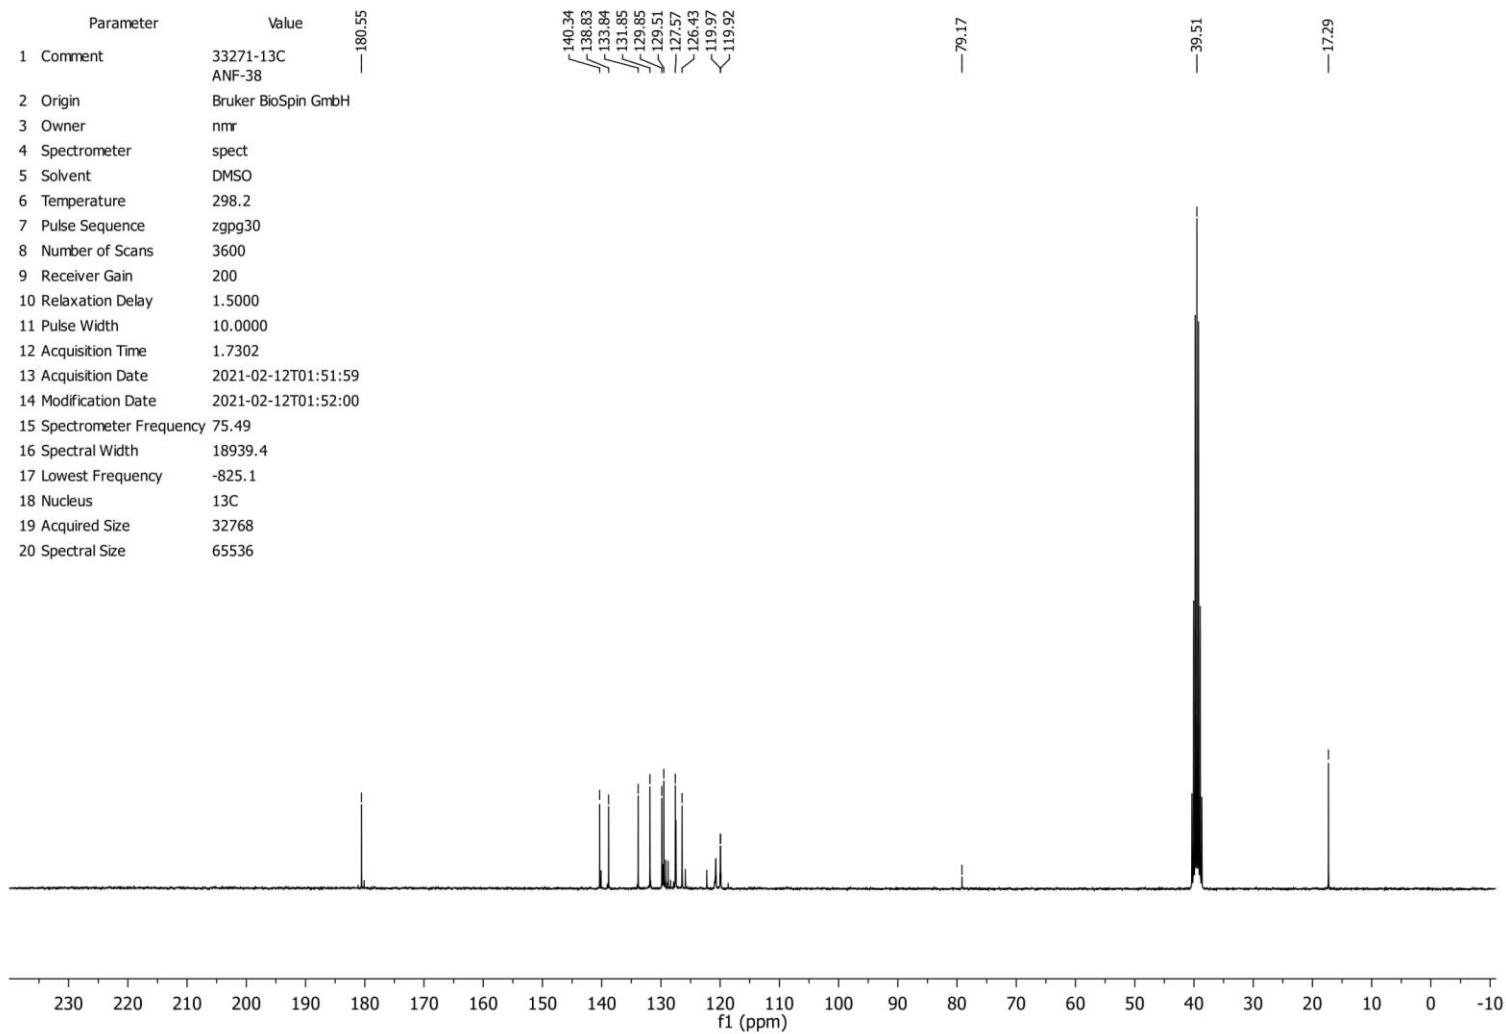

**Spectrum 8.** <sup>13</sup>C NMR of compound **6** (75.5 MHz, DMSO-d<sub>6</sub>).

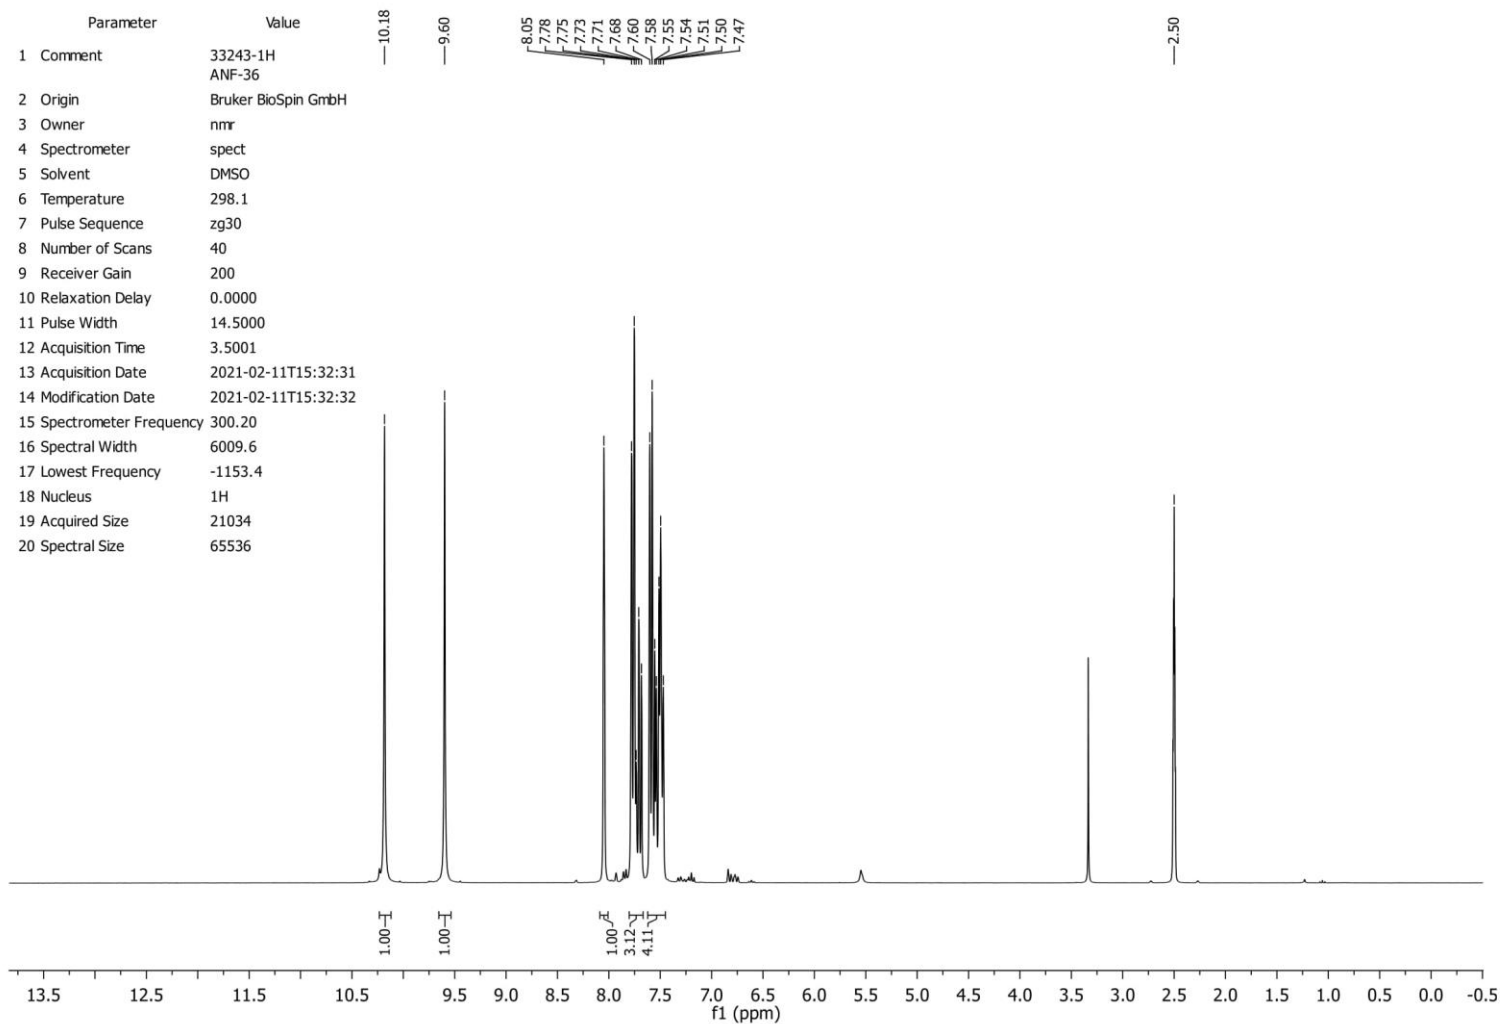

**Spectrum 9.** <sup>1</sup>H NMR of compound **7** (300 MHz, DMSO-d<sub>6</sub>).



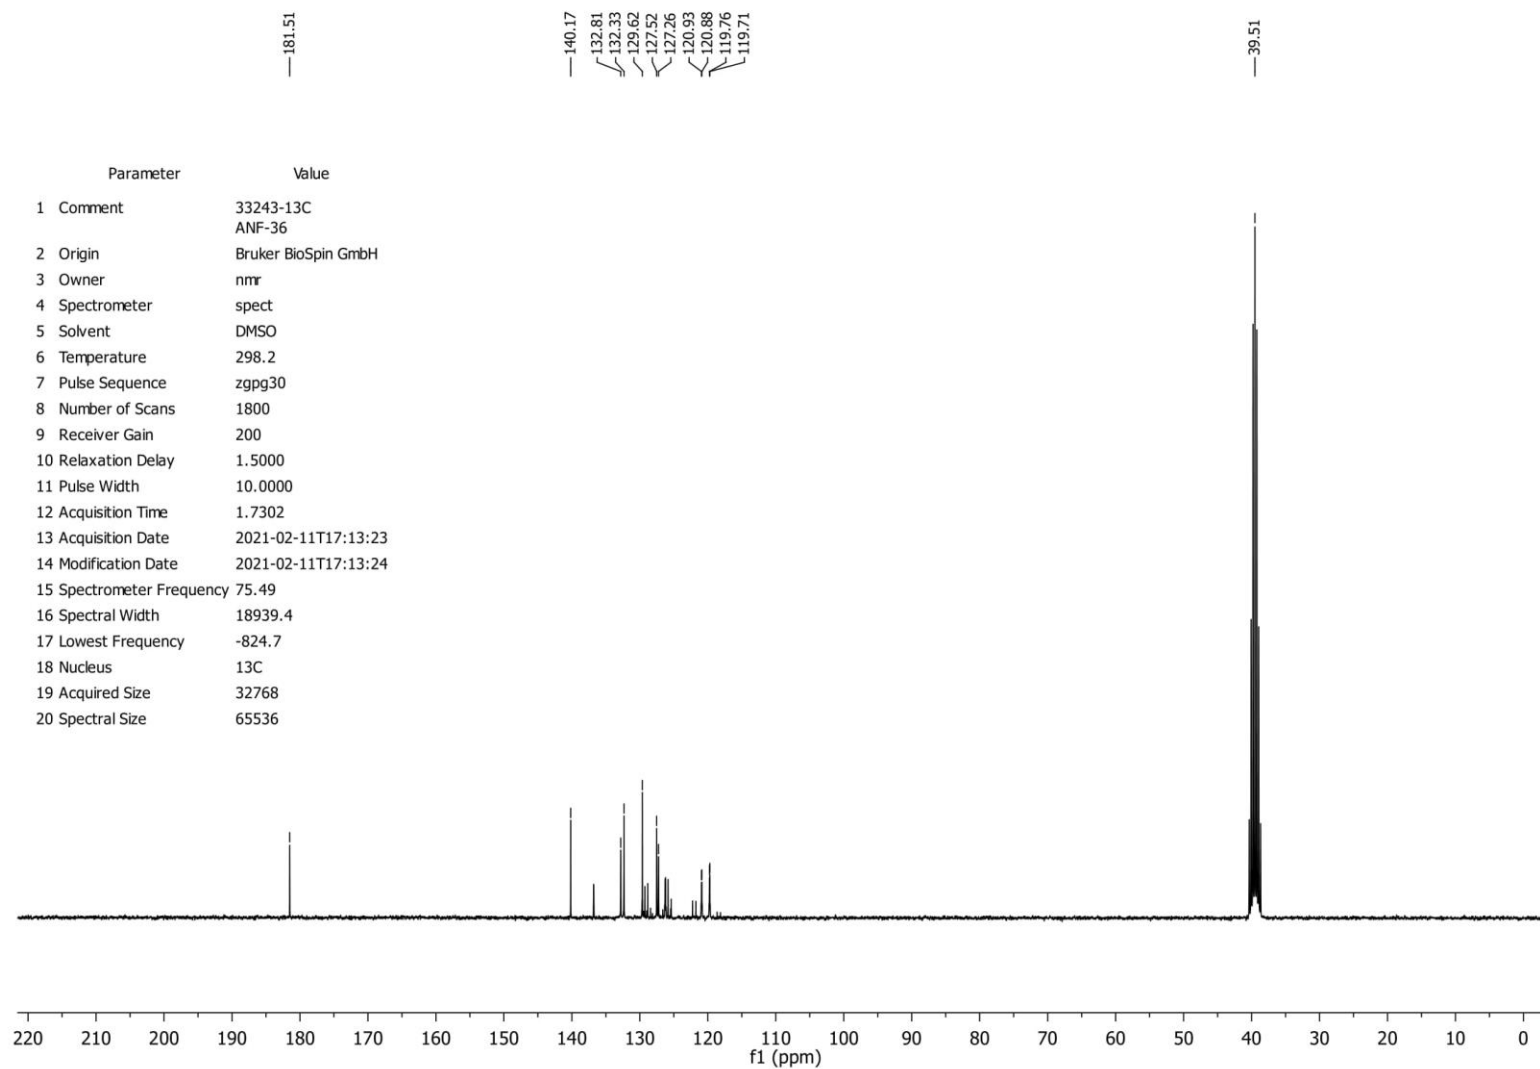

**Spectrum 10.** <sup>13</sup>C NMR of compound 7 (75.5 MHz, DMSO-d<sub>6</sub>).

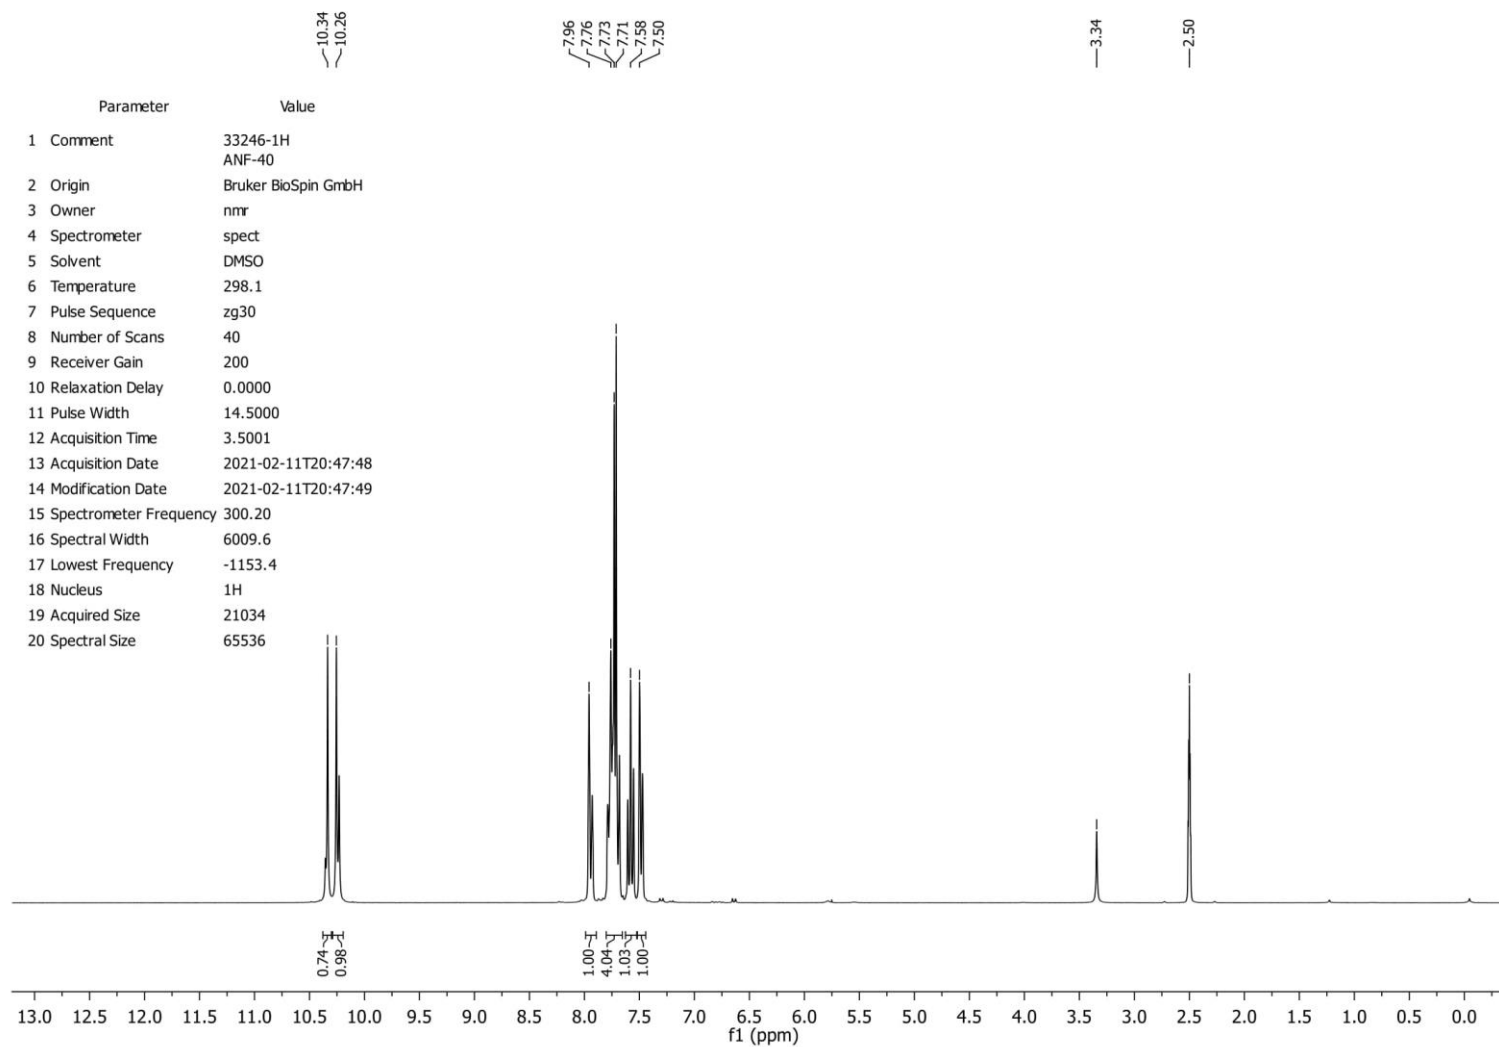

**Spectrum 11.** <sup>1</sup>H NMR of compound **8** (300 MHz, DMSO-d<sub>6</sub>).

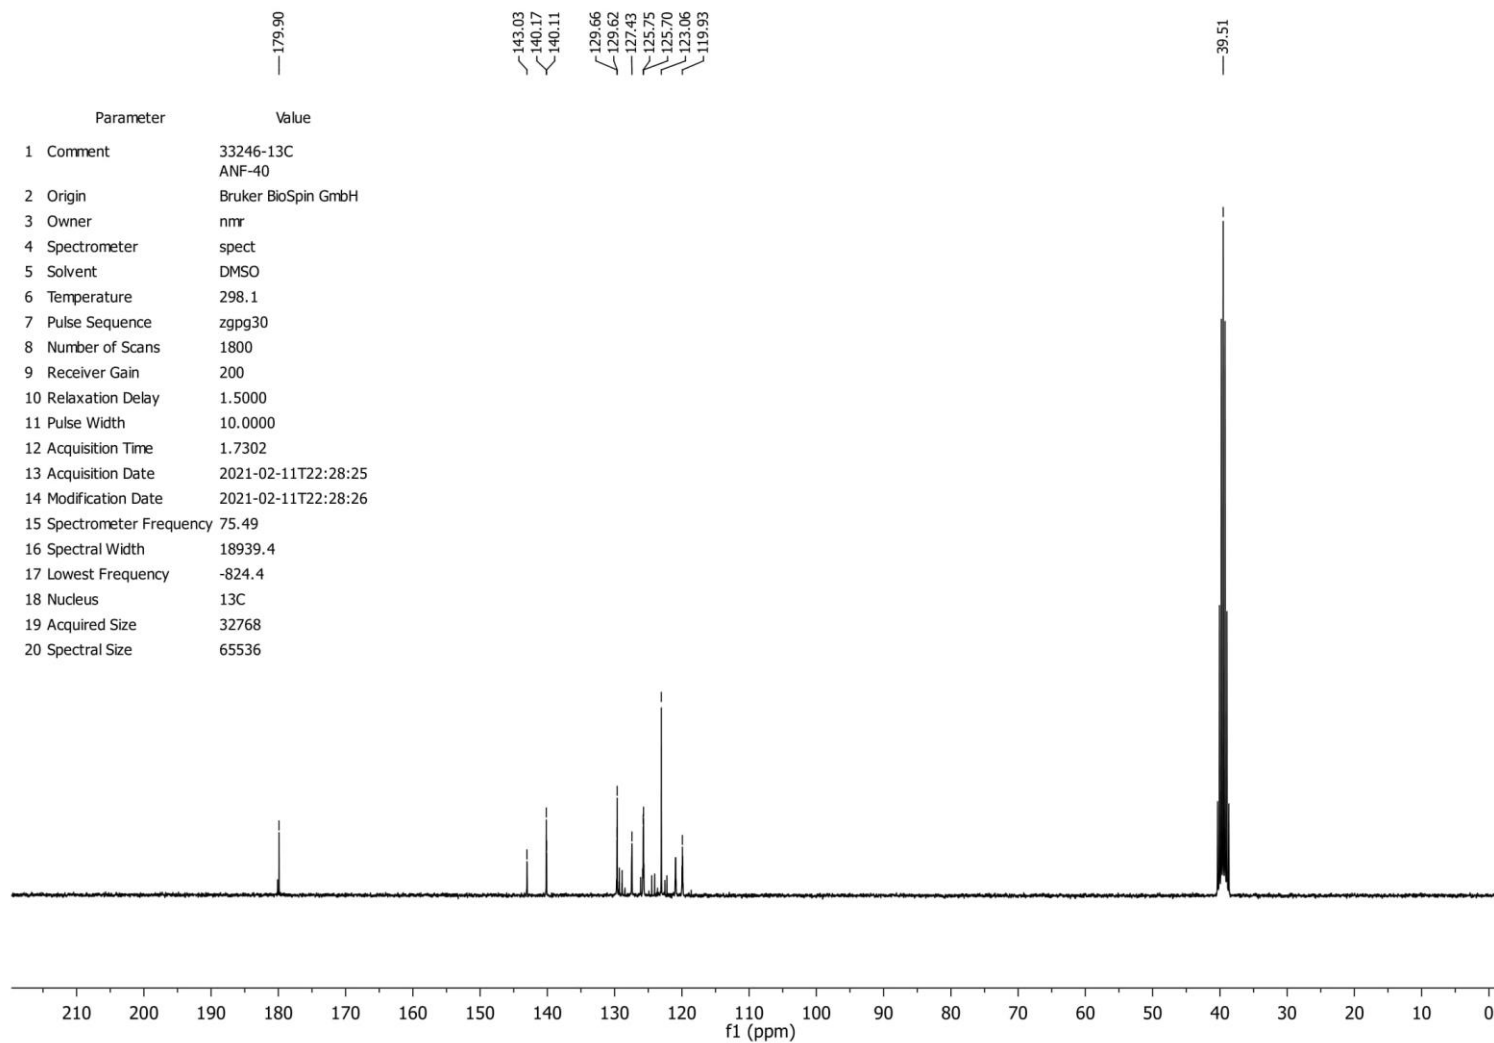

**Spectrum 12.** <sup>13</sup>C NMR of compound **8** (75.5 MHz, DMSO-d<sub>6</sub>).

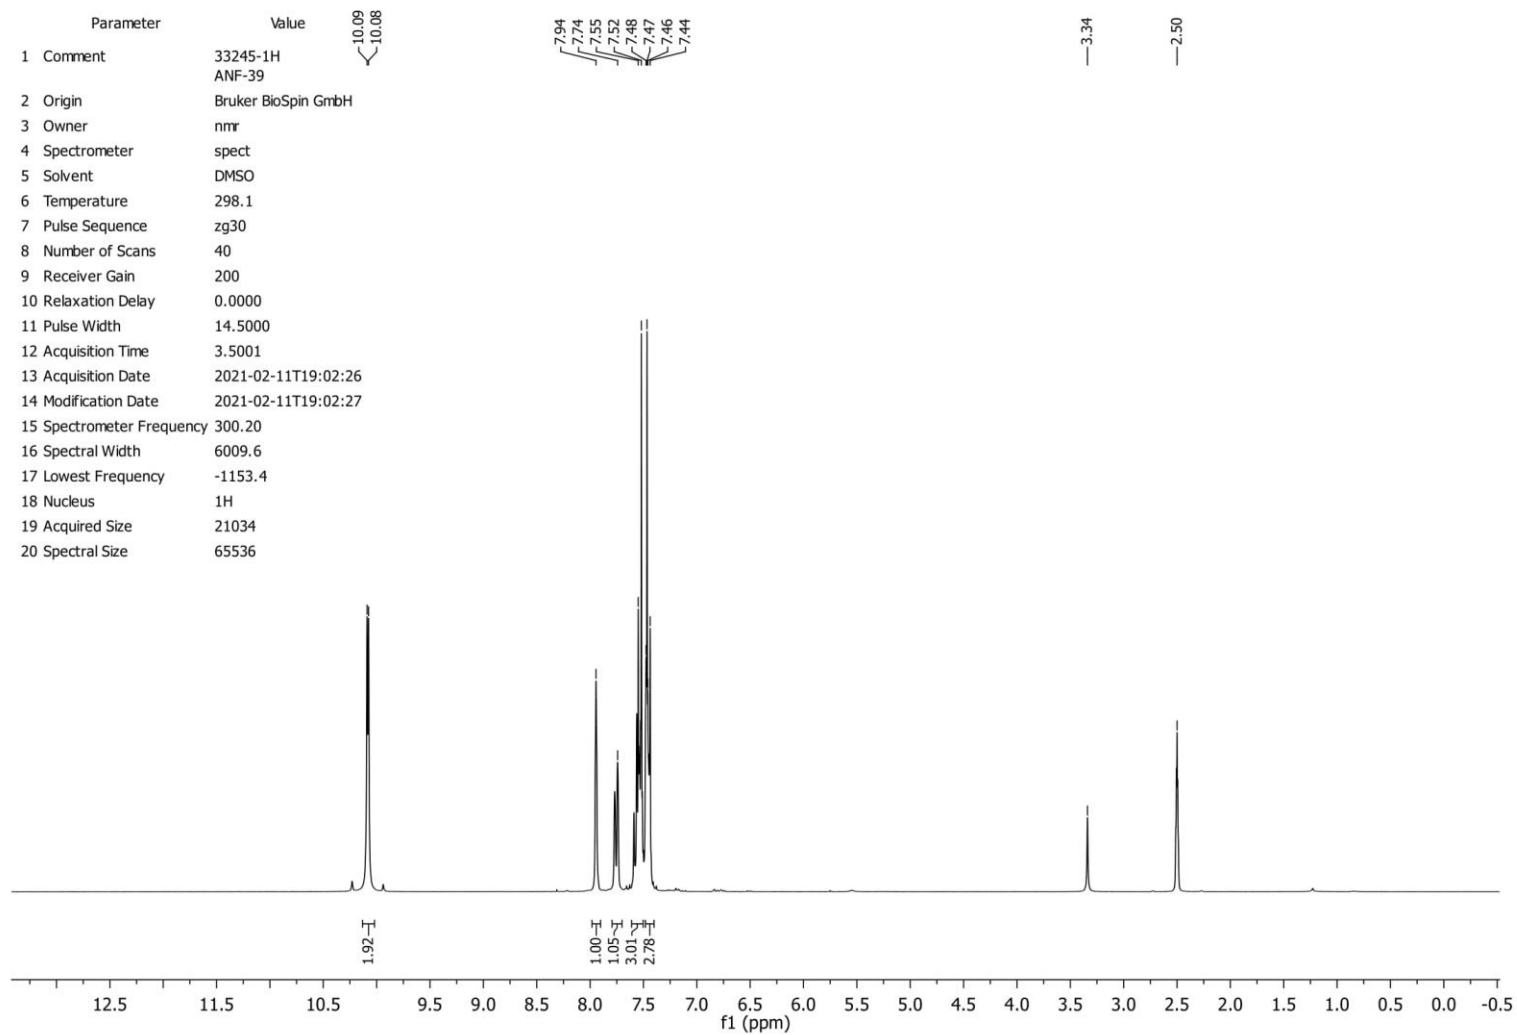

**Spectrum 13.** <sup>1</sup>H NMR of compound **11** (300 MHz, DMSO-d<sub>6</sub>).

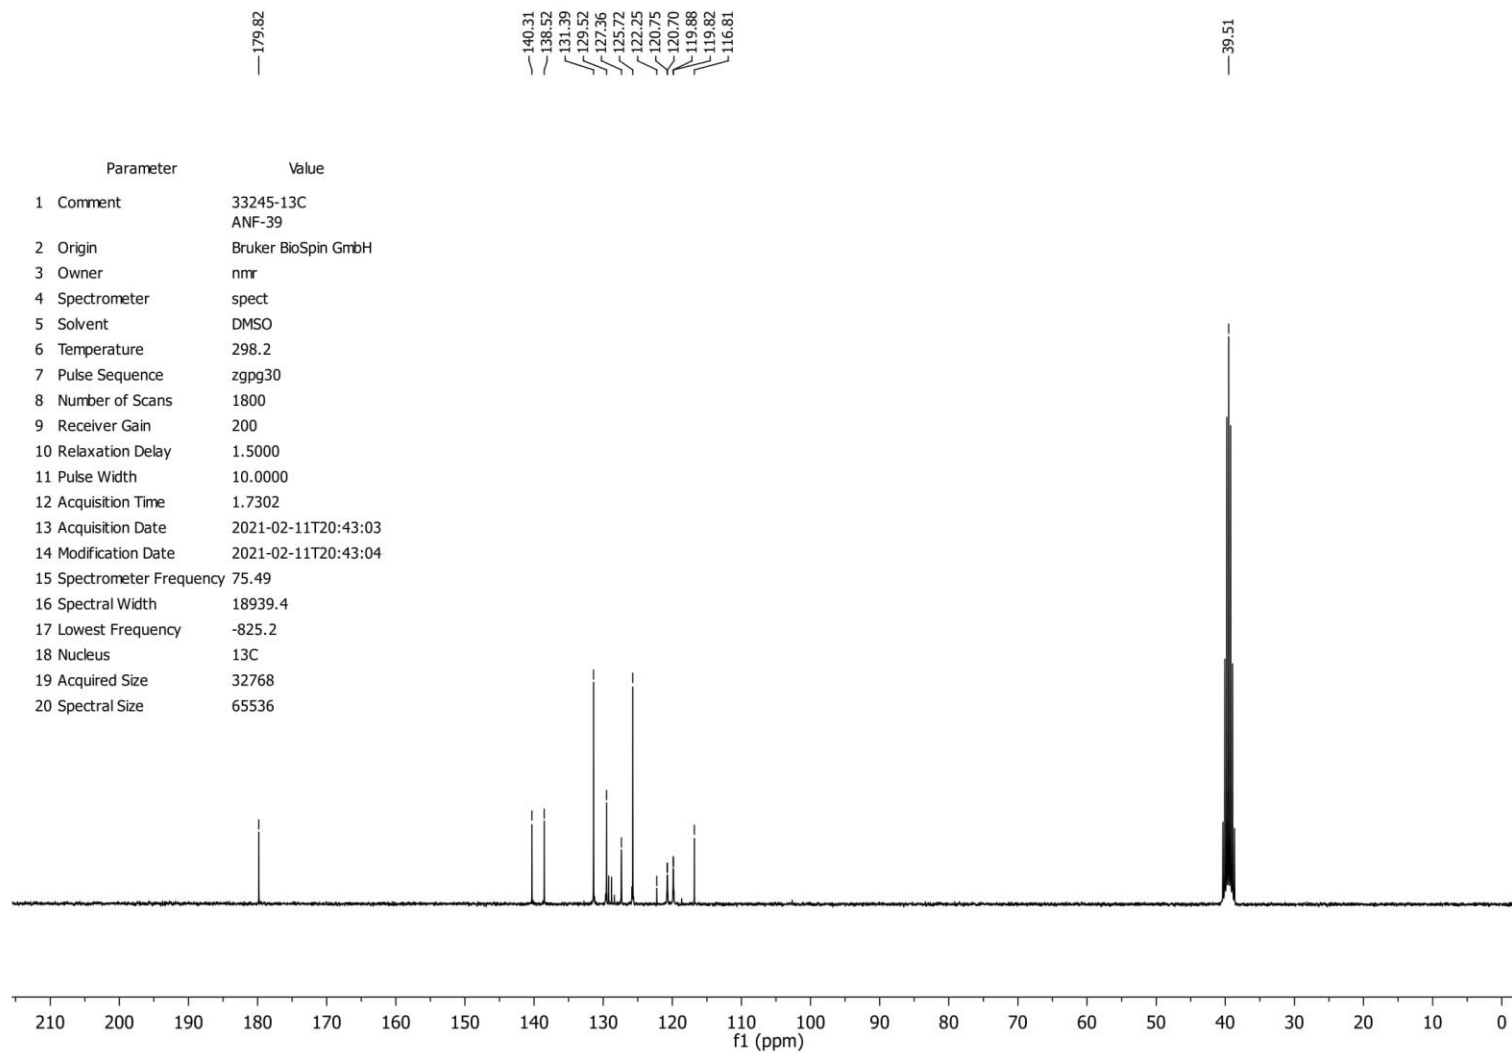

**Spectrum 14.** <sup>13</sup>C NMR of compound **11** (75.5 MHz, DMSO-d<sub>6</sub>).

**Table S1.** High Resolution Mass Spectra (HRMS) of compounds **4**, **6**, **7**, **11**.

|                                               |                                                                                                  |            |       |      |                        |                        |
|-----------------------------------------------|--------------------------------------------------------------------------------------------------|------------|-------|------|------------------------|------------------------|
| <b>compound 4</b><br><b>[M-H]<sup>-</sup></b> | Elemental Composition Report                                                                     |            |       |      |                        |                        |
|                                               | Single Mass Analysis                                                                             |            |       |      |                        |                        |
|                                               | Tolerance = 5.0 PPM / DBE: min = -0.5, max = 50.0                                                |            |       |      |                        |                        |
|                                               | Monoisotopic Mass, Odd and Even Electron Ions                                                    |            |       |      |                        |                        |
|                                               | 2252 formula(e) evaluated with 56 results within limits (up to 50 closest results for each mass) |            |       |      |                        |                        |
|                                               | Minimum:                                                                                         |            | -0.5  |      |                        |                        |
|                                               | Maximum:                                                                                         |            | 200.0 | 5.0  | 50.0                   |                        |
|                                               | Mass                                                                                             | Calc. Mass | mDa   | PPM  | DBE                    | Formula                |
|                                               | 362.9732                                                                                         | 362.9732   | 0.0   | 0.0  | 2.0                    | C8 H11 N3 O3 F2 Na Cl3 |
|                                               | 362.9731                                                                                         | 0.0        | 0.1   | 2.0  | C8 H9 N3 O F5 Cl3      |                        |
|                                               | 362.9731                                                                                         | 0.0        | 0.1   | 3.0  | C9 H8 N O3 F5 Na S Cl  |                        |
|                                               | 362.9732                                                                                         | -0.1       | -0.2  | 14.0 | C17 H5 N O F3 S Cl     |                        |
|                                               | 362.9731                                                                                         | 0.1        | 0.2   | 10.5 | C12 H6 N4 O3 F Na S Cl |                        |
|                                               | 362.9731                                                                                         | 0.1        | 0.3   | 10.0 | C15 H9 N F2 Na S2 Cl   |                        |
|                                               | 362.9733                                                                                         | -0.1       | -0.3  | 14.0 | C17 H7 N O3 Na S Cl    |                        |
|                                               | 362.9733                                                                                         | -0.1       | -0.3  | 13.0 | C16 H8 N3 O Cl3        |                        |
|                                               | 362.9730                                                                                         | 0.1        | 0.3   | 10.5 | C12 H4 N4 O F4 S Cl    |                        |
|                                               | 362.9733                                                                                         | -0.2       | -0.4  | 5.5  | C13 H10 O F4 Cl3       |                        |
|                                               | 362.9734                                                                                         | -0.2       | -0.6  | 5.5  | C13 H12 O3 F Na Cl3    |                        |
|                                               | 362.9729                                                                                         | 0.3        | 0.8   | 6.5  | C10 H8 N4 F3 Na S2 Cl  |                        |
|                                               | 362.9735                                                                                         | -0.4       | -1.0  | 6.0  | C9 H7 N5 F4 S Cl2      |                        |
|                                               | 362.9728                                                                                         | 0.4        | 1.0   | 17.5 | C19 H5 N2 O2 Cl2       |                        |
|                                               | 362.9728                                                                                         | 0.4        | 1.0   | 8.5  | C14 H10 O3 F2 S2 Cl    |                        |
|                                               | 362.9736                                                                                         | -0.4       | -1.1  | 6.0  | C9 H9 N5 O2 F Na S Cl2 |                        |
|                                               | 362.9726                                                                                         | 0.5        | 1.4   | 6.5  | C11 H6 N2 O2 F5 Cl2    |                        |
|                                               | 362.9726                                                                                         | 0.5        | 1.5   | 4.0  | C8 H12 N5 O3 S Cl3     |                        |
|                                               | 362.9737                                                                                         | -0.6       | -1.5  | 9.5  | C14 H8 N2 F3 S Cl2     |                        |
|                                               | 362.9726                                                                                         | 0.6        | 1.6   | 14.0 | C14 H4 N5 O2 F Cl2     |                        |
|                                               | 362.9738                                                                                         | -0.6       | -1.6  | 10.0 | C11 H5 N5 O3 F2 Cl2    |                        |
|                                               | 362.9726                                                                                         | 0.6        | 1.6   | 5.0  | C9 H9 N3 O3 F3 S2 Cl   |                        |
|                                               | 362.9738                                                                                         | -0.6       | -1.7  | 9.5  | C14 H10 N2 O2 Na S Cl2 |                        |

|  |          |      |      |      |                         |
|--|----------|------|------|------|-------------------------|
|  | 362.9738 | -0.6 | -1.7 | 2.5  | C8 H7 N2 O3 F6 Cl2      |
|  | 362.9725 | 0.7  | 1.9  | 2.5  | C9 H10 N2 O F4 Na S Cl2 |
|  | 362.9724 | 0.7  | 2.0  | 10.0 | C12 H8 N5 O Na S Cl2    |
|  | 362.9740 | -0.8 | -2.1 | 13.5 | C16 H6 N2 O3 F Cl2      |
|  | 362.9740 | -0.8 | -2.3 | 2.5  | C7 H9 N4 O F4 Na S2 Cl  |
|  | 362.9741 | -0.9 | -2.5 | 4.0  | C9 H6 N3 F6 Na Cl2      |
|  | 362.9722 | 0.9  | 2.6  | 9.5  | C16 H11 O2 Na Cl3       |
|  | 362.9722 | 1.0  | 2.7  | 9.5  | C16 H9 F3 Cl3           |
|  | 362.9742 | -1.0 | -2.8 | 6.5  | C9 H5 N4 O2 F5 S Cl     |
|  | 362.9721 | 1.0  | 2.8  | 8.0  | C14 H12 N O F S2 Cl2    |
|  | 362.9742 | -1.0 | -2.9 | 6.0  | C12 H10 N O F3 Na S2 Cl |
|  | 362.9742 | -1.1 | -2.9 | 15.0 | C17 H5 N3 F Na Cl2      |
|  | 362.9721 | 1.1  | 2.9  | 18.0 | C20 H4 N F2 S Cl        |
|  | 362.9743 | -1.1 | -3.0 | 7.5  | C14 H7 F5 Na Cl2        |
|  | 362.9720 | 1.1  | 3.1  | 6.0  | C11 H10 N3 O2 F Na Cl3  |
|  | 362.9744 | -1.2 | -3.2 | 17.5 | C17 H4 N4 O2 S Cl       |
|  | 362.9720 | 1.2  | 3.3  | 6.0  | C11 H8 N3 F4 Cl3        |
|  | 362.9720 | 1.2  | 3.3  | 7.0  | C12 H7 N O2 F4 Na S Cl  |
|  | 362.9744 | -1.2 | -3.4 | 10.0 | C14 H6 N O2 F4 S Cl     |
|  | 362.9719 | 1.2  | 3.4  | 14.5 | C15 H5 N4 O2 Na S Cl    |
|  | 362.9719 | 1.2  | 3.4  | 4.5  | C9 H11 N4 O F2 S2 Cl2   |
|  | 362.9744 | -1.3 | -3.5 | 9.0  | C13 H9 N3 O2 F Cl3      |
|  | 362.9745 | -1.3 | -3.6 | 1.5  | C10 H11 O2 F5 Cl3       |
|  | 362.9718 | 1.4  | 3.8  | 3.5  | C7 H6 N4 O2 F5 Na S Cl  |
|  | 362.9746 | -1.5 | -4.0 | 12.5 | C18 H10 O2 Cl3          |
|  | 362.9717 | 1.5  | 4.2  | 12.5 | C17 H9 O2 F S2 Cl       |
|  | 362.9715 | 1.6  | 4.5  | 10.5 | C14 H7 N2 O3 F Na Cl2   |

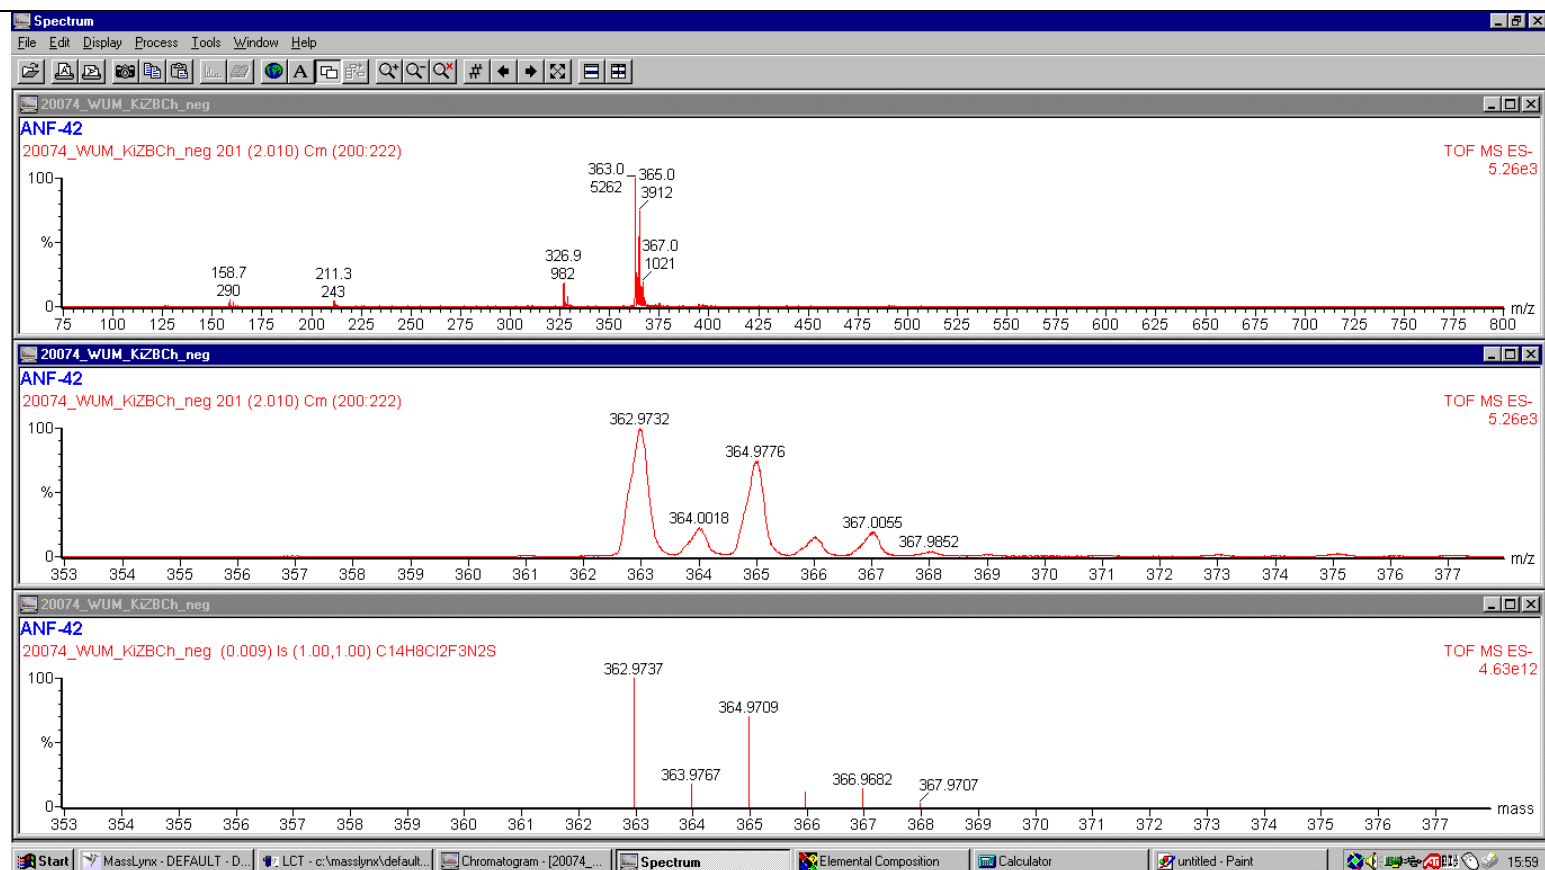

**Compound 6**  
[M-H]<sup>-</sup>

**Single Mass Analysis**

Tolerance = 5.0 PPM / DBE: min = -0.5, max = 50.0

Monoisotopic Mass, Odd and Even Electron Ions

2888 formula(e) evaluated with 50 results within limits (up to 50 closest results for each mass)

Minimum: -0.5

Maximum: 200.0 5.0 50.0

| Mass     | Calc. Mass | mDa       | PPM                  | DBE                | Formula |
|----------|------------|-----------|----------------------|--------------------|---------|
| 343.0299 | 343.0300   | -0.1 -0.3 | 1.0                  | C9 H15 N3 F4 S Cl2 |         |
| 343.0300 | -0.1 -0.3  | 11.0      | C15 H9 N3 O F2 Na Cl |                    |         |



|  |          |      |      |      |                         |
|--|----------|------|------|------|-------------------------|
|  | 343.0297 | 0.1  | 0.4  | 8.0  | C16 H16 N O Cl3         |
|  | 343.0300 | -0.2 | -0.4 | 1.0  | C9 H17 N3 O2 F Na S Cl2 |
|  | 343.0300 | -0.2 | -0.5 | 3.5  | C12 H11 O F6 Na Cl      |
|  | 343.0302 | -0.3 | -0.9 | 4.5  | C14 H16 F3 S Cl2        |
|  | 343.0302 | -0.3 | -0.9 | 14.5 | C20 H10 O F Na Cl       |
|  | 343.0302 | -0.3 | -1.0 | 5.0  | C11 H13 N3 O3 F2 Cl2    |
|  | 343.0295 | 0.3  | 1.0  | 4.5  | C11 H15 N4 O F Cl3      |
|  | 343.0295 | 0.3  | 1.0  | 5.5  | C12 H14 N2 O3 F Na S Cl |
|  | 343.0295 | 0.4  | 1.1  | 5.5  | C12 H12 N2 O F4 S Cl    |
|  | 343.0295 | 0.4  | 1.2  | 13.0 | C15 H10 N5 O S Cl       |
|  | 343.0304 | -0.5 | -1.5 | 8.5  | C16 H14 O3 F Cl2        |
|  | 343.0293 | 0.5  | 1.6  | 2.0  | C7 H13 N5 O3 F2 Na S Cl |
|  | 343.0304 | -0.5 | -1.6 | 5.0  | C10 H15 N5 O Na S2 Cl   |
|  | 343.0293 | 0.6  | 1.6  | 1.5  | C10 H16 N2 F3 Na S2 Cl  |
|  | 343.0293 | 0.6  | 1.7  | 2.0  | C7 H11 N5 O F5 S Cl     |
|  | 343.0305 | -0.6 | -1.8 | 6.5  | C12 H12 N4 F2 Na Cl2    |
|  | 343.0293 | 0.6  | 1.8  | 12.5 | C19 H13 O2 Cl2          |
|  | 343.0306 | -0.7 | -2.1 | 9.0  | C12 H11 N5 O2 F S Cl    |
|  | 343.0306 | -0.8 | -2.2 | 1.5  | C9 H13 N2 O2 F5 S Cl    |
|  | 343.0291 | 0.8  | 2.3  | 1.5  | C11 H14 O2 F5 Cl2       |
|  | 343.0307 | -0.8 | -2.3 | 10.0 | C17 H13 N F Na Cl2      |
|  | 343.0307 | -0.8 | -2.4 | 0.5  | C8 H16 N4 O2 F2 Cl3     |
|  | 343.0291 | 0.8  | 2.4  | 9.0  | C14 H12 N3 O2 F Cl2     |
|  | 343.0290 | 0.8  | 2.4  | 0.0  | C9 H17 N O3 F3 S2 Cl    |
|  | 343.0290 | 0.8  | 2.4  | 18.5 | C23 H9 Na Cl            |
|  | 343.0308 | -0.9 | -2.7 | 12.5 | C17 H12 N2 O2 S Cl      |
|  | 343.0289 | 1.0  | 2.9  | 7.5  | C15 H10 F5 Na Cl        |
|  | 343.0289 | 1.0  | 2.9  | 5.0  | C12 H16 N3 O Na S Cl2   |
|  | 343.0309 | -1.0 | -3.0 | 4.0  | C13 H17 N O2 F Cl3      |
|  | 343.0288 | 1.0  | 3.0  | 15.0 | C18 H8 N3 F Na Cl       |
|  | 343.0287 | 1.2  | 3.5  | 4.0  | C10 H9 N3 F6 Na Cl      |
|  | 343.0311 | -1.2 | -3.5 | 7.0  | C12 H8 N3 F6 Cl         |
|  | 343.0311 | -1.3 | -3.7 | 7.0  | C12 H10 N3 O2 F3 Na Cl  |

|  |          |      |      |      |                         |
|--|----------|------|------|------|-------------------------|
|  | 343.0286 | 1.3  | 3.8  | 13.5 | C17 H9 N2 O3 F Cl       |
|  | 343.0313 | -1.4 | -4.0 | 18.0 | C20 H7 N3 F Cl          |
|  | 343.0313 | -1.4 | -4.1 | 8.0  | C14 H15 N3 O S Cl2      |
|  | 343.0313 | -1.4 | -4.1 | 10.5 | C17 H9 F5 Cl            |
|  | 343.0284 | 1.4  | 4.2  | 1.0  | C11 H16 N F4 Cl3        |
|  | 343.0313 | -1.5 | -4.2 | 0.5  | C11 H17 O F4 S Cl2      |
|  | 343.0313 | -1.5 | -4.2 | 10.5 | C17 H11 O2 F2 Na Cl     |
|  | 343.0284 | 1.5  | 4.3  | 2.5  | C9 H10 N2 O3 F6 Cl      |
|  | 343.0284 | 1.5  | 4.3  | 8.5  | C14 H14 N4 Cl3          |
|  | 343.0284 | 1.5  | 4.3  | 9.5  | C15 H13 N2 O2 Na S Cl   |
|  | 343.0284 | 1.5  | 4.4  | 10.0 | C12 H8 N5 O3 F2 Cl      |
|  | 343.0284 | 1.5  | 4.4  | 9.5  | C15 H11 N2 F3 S Cl      |
|  | 343.0315 | -1.7 | -4.8 | 1.0  | C7 H14 N5 F4 S2 Cl      |
|  | 343.0282 | 1.7  | 4.9  | 6.0  | C10 H12 N5 O2 F Na S Cl |
|  | 343.0316 | -1.7 | -4.9 | 1.0  | C7 H16 N5 O2 F Na S2 Cl |

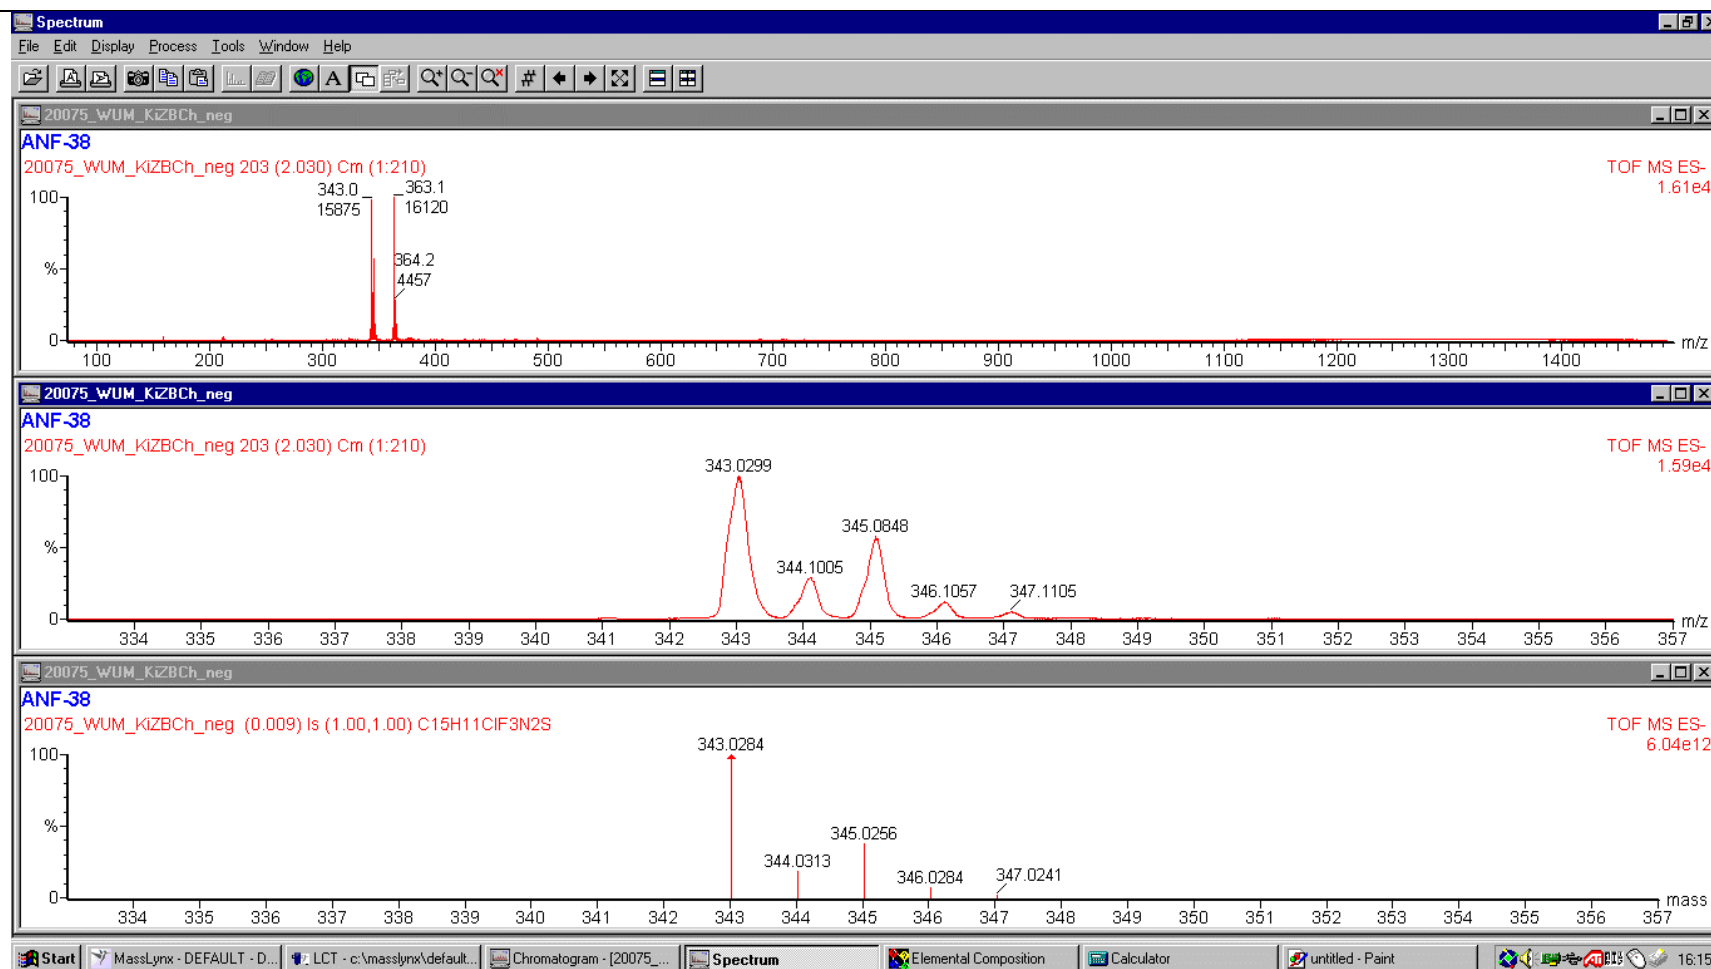

**Compound 7**  
**[M-H]<sup>-</sup>**

Single Mass Analysis

Tolerance = 5.0 PPM / DBE: min = -0.5, max = 50.0

Monoisotopic Mass, Odd and Even Electron Ions

1431 formula(e) evaluated with 33 results within limits (up to 50 closest results for each mass)

Minimum: -0.5

Maximum: 200.0 5.0 50.0

| Mass     | Calc. Mass | mDa  | PPM  | DBE                   | Formula         |
|----------|------------|------|------|-----------------------|-----------------|
| 363.0379 | 363.0379   | 0.0  | 0.0  | 14.0                  | C15 H5 N5 O2 F4 |
| 363.0380 | 0.0        | -0.1 | 6.5  | C12 H7 N2 O2 F8       |                 |
| 363.0378 | 0.1        | 0.4  | 2.5  | C10 H11 N2 O F7 Na S  |                 |
| 363.0378 | 0.2        | 0.4  | 3.0  | C7 H6 N5 O2 F9        |                 |
| 363.0378 | 0.2        | 0.5  | 10.0 | C13 H9 N5 O F3 Na S   |                 |
| 363.0381 | -0.2       | -0.6 | 17.5 | C20 H6 N2 O2 F3       |                 |
| 363.0375 | 0.5        | 1.3  | 8.0  | C15 H13 N O F4 S2     |                 |
| 363.0384 | -0.5       | -1.3 | 0.5  | C7 H13 N4 O2 F6 S2    |                 |
| 363.0373 | 0.7        | 1.8  | 4.5  | C10 H12 N4 O F5 S2    |                 |
| 363.0386 | -0.7       | -1.9 | 4.0  | C12 H14 N O2 F5 S2    |                 |
| 363.0389 | -0.9       | -2.6 | 6.0  | C10 H8 N5 F7 S        |                 |
| 363.0389 | -1.0       | -2.7 | 6.0  | C10 H10 N5 O2 F4 Na S |                 |
| 363.0369 | 1.1        | 2.9  | 10.5 | C15 H8 N2 O3 F4 Na    |                 |
| 363.0368 | 1.1        | 3.0  | 10.5 | C15 H6 N2 O F7        |                 |
| 363.0391 | -1.1       | -3.1 | 9.5  | C15 H9 N2 F6 S        |                 |
| 363.0368 | 1.1        | 3.1  | 18.0 | C18 H4 N5 O F3        |                 |
| 363.0391 | -1.1       | -3.2 | 10.0 | C12 H6 N5 O3 F5       |                 |
| 363.0391 | -1.2       | -3.2 | 9.5  | C15 H11 N2 O2 F3 Na S |                 |
| 363.0391 | -1.2       | -3.3 | 2.5  | C9 H8 N2 O3 F9        |                 |
| 363.0367 | 1.2        | 3.4  | -0.5 | C7 H9 N2 O3 F9 Na     |                 |
| 363.0367 | 1.3        | 3.5  | 7.0  | C10 H7 N5 O3 F5 Na    |                 |
| 363.0367 | 1.3        | 3.5  | 6.5  | C13 H10 N2 F6 Na S    |                 |
| 363.0366 | 1.3        | 3.6  | 7.0  | C10 H5 N5 O F8        |                 |
| 363.0393 | -1.3       | -3.7 | 13.5 | C17 H7 N2 O3 F4       |                 |
| 363.0394 | -1.5       | -4.0 | 4.0  | C10 H7 N3 F9 Na       |                 |
| 363.0365 | 1.5        | 4.1  | 3.0  | C8 H9 N5 F7 Na S      |                 |
| 363.0364 | 1.5        | 4.3  | 5.0  | C12 H11 N O3 F6 S     |                 |
| 363.0363 | 1.6        | 4.4  | 12.0 | C18 H12 N F3 S2       |                 |
| 363.0396 | -1.6       | -4.5 | 15.0 | C18 H6 N3 F4 Na       |                 |
| 363.0396 | -1.7       | -4.6 | 7.5  | C15 H8 F8 Na          |                 |
| 363.0362 | 1.7        | 4.8  | 1.5  | C7 H10 N4 O3 F7 S     |                 |
| 363.0362 | 1.8        | 4.9  | 1.0  | C10 H13 N F8 S2       |                 |



|          |          |      |      |                         |                       |
|----------|----------|------|------|-------------------------|-----------------------|
| 372.9631 | 372.9632 | 0.0  | -0.1 | 1.5                     | C9 H14 N2 F3 Na S2 Br |
| 372.9633 | -0.2     | -0.4 | 13.0 | C14 H8 N5 O S Br        |                       |
| 372.9633 | -0.2     | -0.5 | 5.5  | C11 H10 N2 O F4 S Br    |                       |
| 372.9634 | -0.2     | -0.6 | 5.5  | C11 H12 N2 O3 F Na S Br |                       |
| 372.9627 | 0.4      | 1.1  | 7.5  | C14 H8 F5 Na Br         |                       |
| 372.9627 | 0.5      | 1.2  | 15.0 | C17 H6 N3 F Na Br       |                       |
| 372.9625 | 0.6      | 1.6  | 4.0  | C9 H7 N3 F6 Na Br       |                       |
| 372.9638 | -0.7     | -1.8 | 11.0 | C14 H7 N3 O F2 Na Br    |                       |
| 372.9624 | 0.7      | 2.0  | 13.5 | C16 H7 N2 O3 F Br       |                       |
| 372.9639 | -0.7     | -2.0 | 3.5  | C11 H9 O F6 Na Br       |                       |
| 372.9622 | 0.9      | 2.4  | 2.5  | C8 H8 N2 O3 F6 Br       |                       |
| 372.9640 | -0.9     | -2.4 | 14.5 | C19 H8 O F Na Br        |                       |
| 372.9622 | 0.9      | 2.4  | 9.5  | C14 H11 N2 O2 Na S Br   |                       |
| 372.9622 | 0.9      | 2.5  | 10.0 | C11 H6 N5 O3 F2 Br      |                       |
| 372.9622 | 0.9      | 2.5  | 9.5  | C14 H9 N2 F3 S Br       |                       |
| 372.9620 | 1.1      | 3.0  | 6.0  | C9 H10 N5 O2 F Na S Br  |                       |
| 372.9643 | -1.1     | -3.0 | 5.0  | C9 H13 N5 O Na S2 Br    |                       |
| 372.9620 | 1.1      | 3.1  | 6.0  | C9 H8 N5 F4 S Br        |                       |
| 372.9644 | -1.3     | -3.5 | 9.0  | C11 H9 N5 O2 F S Br     |                       |
| 372.9645 | -1.3     | -3.6 | 1.5  | C8 H11 N2 O2 F5 S Br    |                       |
| 372.9617 | 1.4      | 3.7  | 4.0  | C11 H14 N O2 F2 S2 Br   |                       |
| 372.9646 | -1.5     | -4.0 | 12.5 | C16 H10 N2 O2 S Br      |                       |
| 372.9649 | -1.8     | -4.8 | 7.0  | C11 H6 N3 F6 Br         |                       |
| 372.9650 | -1.8     | -4.9 | 7.0  | C11 H8 N3 O2 F3 Na Br   |                       |

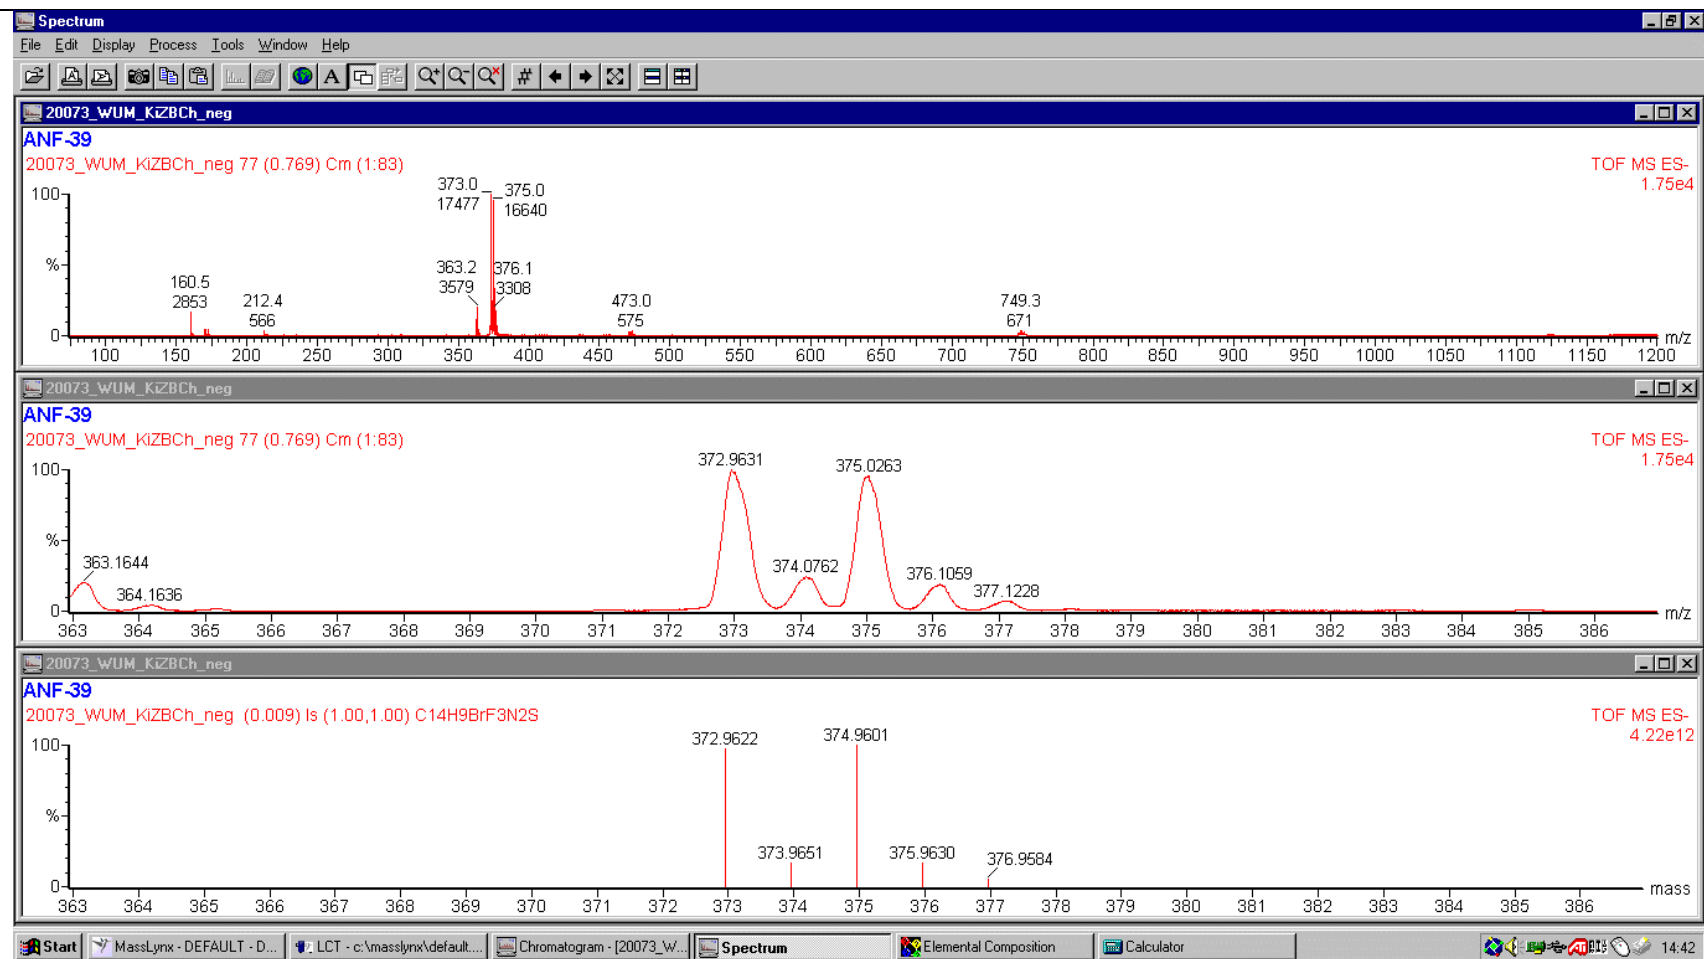

Supplement: s1 [file s1]
